# Supplementary material for: Minimizing the Anticodon-Recognized Loop of Methanococcus jannaschii Tyrosyl-tRNA Synthetase to Improve the Efficiency of Incorporating Noncanonical Amino Acids
Source: MDPI journal article supplement (doi:10.3390/biom13040610), 2023-03-28
Supplement: s1 [file s1]

# **Minimizing the Anticodon-Recognized Loop of *Methanococcus jannaschii* Tyrosyl-tRNA Synthetase to Improve the Efficiency of Incorporating Noncanonical Amino Acids**

Zhiyang Hu <sup>†</sup>, Jinming Liang <sup>†</sup>, Taogeng Su, Di Zhang, Hao Li, Xiangdong Gao <sup>\*</sup>,  
Wenbin Yao <sup>\*</sup> and Xiaoda Song <sup>\*</sup>

**Table S1.** Primers used for this study.

| Sequence                                                                                                      | Usage         |
|---------------------------------------------------------------------------------------------------------------|---------------|
| MjLoop-1-s: accctgtgcggcTTGACAGTTAATAGCTATGAGGAG<br>MjLoop-1-as: caagccgcacagGGTTAAAGGATATTCAAGGAAGT          | MjTyrRS-Loop1 |
| MjLoop-2-s: accggaagtggTGTGACAGTTAATAGCTATGAGGAG<br>MjLoop-2-as: caaaccacttccGGTTAAAGGATATTCAAGGAAGT          | MjTyrRS-Loop2 |
| MjLoop-3-s: accggaggtagtggTGTGACAGTTAATAGCTATGAGGAG<br>MjLoop-3-as: caaaccactactccGGTTAAAGGATATTCAAGGAAGT     | MjTyrRS-Loop3 |
| eGFP150-TGA-s: CAGCCACtgaGTGTACATCATGGCGGACAAGC<br>eGFP150-TGA-as: TGTACACtcaGTGGCTGTTGTAGTTATACTCCAGCT       | eGFP150-TGA   |
| MjtRNA-TGA-s: CGGCGGACTtcaAATCCGCATGGCAGGGGTTCAAATC<br>MjtRNA-TGA-as: GGATTtgaAGTCCGCCGTTCTGCCCTGCTGAACT      | MjtRNA-TGA    |
| eGFP150-TAA-s: CAGCCACtaaGTGTACATCATGGCGGACAAGC<br>eGFP150-TAA-as: TGTACACttaGTGGCTGTTGTAGTTATACTCCAGCT       | eGFP150-TAA   |
| MjtRNA-TAA-s: CGGCGGACTttaAATCCGCATGGCAGGGGTTCAAATC<br>MjtRNA-TAA-as: GGATTtaaAGTCCGCCGTTCTGCCCTGCTGAACT      | MjtRNA-TAA    |
| eGFP150-TAGA-s: CAGCCACtagaGTGTACATCATGGCGGACAAGC<br>eGFP150-TAGA-as: TGTACACtctaGTGGCTGTTGTAGTTATACTCCAGCT   | eGFP150-TAGA  |
| MjtRNA-TAGA-s: CGGCGGACTtctaAATCCGCATGGCAGGGGTTCAAATC<br>MjtRNA-TAGA-as: GGATTtagaAGTCCGCCGTTCTGCCCTGCTGAACT  | MjtRNA-TAGA   |
| eGFP150-TAGT-s: CAGCCACtagtGTGTACATCATGGCGGACAAGC<br>eGFP150-TAGT-as: TGTACACactaGTGGCTGTTGTAGTTATACTCCAGCT   | eGFP150-TAGT  |
| MjtRNA-TAGT-s: CGGCGGACTactaAATCCGCATGGCAGGGGTTCAAATC<br>MjtRNA-TAGT-as: GGATTtagtAGTCCGCCGTTCTGCCCTGCTGAACT  | MjtRNA-TAGT   |
| eGFP150-TAGC-s: CAGCCACtagcGTGTACATCATGGCGGACAAGC<br>eGFP150-TAGC-as: TGTACACgctaGTGGCTGTTGTAGTTATACTCCAGCT   | eGFP150-TAGC  |
| MjtRNA-TAGC-s: CGGCGGACTgctaAATCCGCATGGCAGGGGTTCAAATC<br>MjtRNA-TAGC-as: GGATTtagcAGTCCGCCGTTCTGCCCTGCTGAACT  | MjtRNA-TAGC   |
| eGFP150-TAGG-s: CAGCCACtaggGTGTACATCATGGCGGACAAGC<br>eGFP150-TAGG-as: TGTACACcctaGTGGCTGTTGTAGTTATACTCCAGCT   | eGFP150-TAGG  |
| MjtRNA-TAGG-s: CGGCGGACTcctaAATCCGCATGGCAGGGGTTCAAATC<br>MjtRNA-TAGG-as: GGATTtaggAGTCCGCCGTTCTGCCCTGCTGAACT  | MjtRNA-TAGG   |
| eGFP150-TGAA-s: CAGCCACtgaaGTGTACATCATGGCGGACAAGC<br>eGFP150-TGAA-as: TGTACACttcaGTGGCTGTTGTAGTTATACTCCAGCT   | eGFP150-TGAA  |
| MjtRNA-TGAA-s: CGGCGGACTttcaAATCCGCATGGCAGGGGTTCAAATC<br>MjtRNA-TGAA-as: GGATTtgaaAGTCCGCCGTTCTGCCCTGCTGAACT  | MjtRNA-TGAA   |
| eGFP150-TGAT-s: CAGCCACtgatGTGTACATCATGGCGGACAAGC<br>eGFP150-TGAT-as: TGTACACatcaGTGGCTGTTGTAGTTATACTCCAGCT   | eGFP150-TGAT  |
| MjtRNA-TGAT-s: CGGCGGACTatcaAATCCGCATGGCAGGGGTTCAAATC<br>MjtRNA-TGAT-as: GGATTtgatAGTCCGCCGTTCTGCCCTGCTGAACT  | MjtRNA-TGAT   |
| eGFP150-TGAC-s: CAGCCACtgacGTGTACATCATGGCGGACAAGC<br>eGFP150-TGAC-as: TGTACACgtcaGTGGCTGTTGTAGTTATACTCCAGCT   | eGFP150-TGAC  |
| MjtRNA-TGAC-s: CCGGCGGACTgtcaAATCCGCATGGCAGGGGTTCAAATC<br>MjtRNA-TGAC-as: GGATTtgacAGTCCGCCGTTCTGCCCTGCTGAACT | MjtRNA-TGAC   |
| eGFP150-TGAG-s: CAGCCACtgagGTGTACATCATGGCGGACAAGC<br>eGFP150-TGAG-as: TGTACACctcaGTGGCTGTTGTAGTTATACTCCAGCT   | eGFP150-TGAG  |
| MjtRNA-TGAG-s: CGGCGGACTctcaAATCCGCATGGCAGGGGTTCAAATC<br>MjtRNA-TGAG-as: GGATTtgagAGTCCGCCGTTCTGCCCTGCTGAACT  | MjtRNA-TGAG   |
| eGFP150-TAAA-s: CAGCCACtaaaGTGTACATCATGGCGGACAAGC<br>eGFP150-TAAA-as: TGTACACttaGTGGCTGTTGTAGTTATACTCCAGCT    | eGFP150-TAAA  |

|                                                                                                              |              |
|--------------------------------------------------------------------------------------------------------------|--------------|
| MjtRNA-TAAA-s: CGGCGGACTttaAATCCGCATGGCAGGGGTTCAAATC<br>MjtRNA-TAAA-as: GGATTtaaAGTCCGCCGTTCTGCCCTGCTGAACT   | MjtRNA-TAAA  |
| eGFP150-TAAT-s: CAGCCACtaatGTGTACATCATGGCGGACAAGC<br>eGFP150-TAAT-as: TGTACACgtaGTGGCTGTTGTAGTTATACTCCAGCT   | eGFP150-TAAT |
| MjtRNA-TAAT-s: CGGCGGACTattaAATCCGCATGGCAGGGGTTCAAATC<br>MjtRNA-TAAT-as: GGATTtaatAGTCCGCCGTTCTGCCCTGCTGAACT | MjtRNA-TAAT  |
| eGFP150-TAAC-s: CAGCCACtaacGTGTACATCATGGCGGACAAGC<br>eGFP150-TAAC-as: TGTACACgttaGTGGCTGTTGTAGTTATACTCCAGCT  | eGFP150-TAAC |
| MjtRNA-TAAC-s: CGGCGGACTgttaAATCCGCATGGCAGGGGTTCAAATC<br>MjtRNA-TAAC-as: GGATTtaacAGTCCGCCGTTCTGCCCTGCTGAACT | MjtRNA-TAAC  |
| eGFP150-TAAG-s: CAGCCACtaagGTGTACATCATGGCGGACAAGC<br>eGFP150-TAAG-as: TGTACACcttaGTGGCTGTTGTAGTTATACTCCAGCT  | eGFP150-TAAG |
| MjtRNA-TAAG-s: CGGCGGACTcttaAATCCGCATGGCAGGGGTTCAAATC<br>MjtRNA-TAAG-as: GGATTtaagAGTCCGCCGTTCTGCCCTGCTGAACT | MjtRNA-TAAG  |

**Table S2.** The MjTyrRS mutants used in this study.

| Substrate/position        | 32 | 65 | 70 | 107 | 108 | 109 | 158 | 159 | 162 | 167 | 286 |
|---------------------------|----|----|----|-----|-----|-----|-----|-----|-----|-----|-----|
| MjTyrRS(WT)               | Y  | L  | H  | E   | F   | Q   | D   | I   | L   | A   | D   |
| O-Me-Tyr                  | Q  | L  | H  | T   | F   | Q   | A   | I   | P   | A   | D   |
| 4-N <sub>3</sub> -Phe     | T  | L  | H  | N   | F   | Q   | P   | L   | Q   | A   | D   |
| 4-I-Phe                   | L  | L  | H  | S   | F   | Q   | P   | L   | E   | A   | D   |
| 4-B(OH) <sub>2</sub> -Phe | S  | A  | M  | E   | F   | Q   | S   | I   | E   | A   | D   |
| 3-NO <sub>2</sub> -Tyr    | H  | L  | C  | E   | F   | Q   | S   | A   | R   | A   | D   |
| 4-NO <sub>2</sub> -Phe    | L  | V  | H  | E   | W   | M   | G   | A   | L   | A   | D   |
| AcFRA.1                   | L  | L  | H  | E   | F   | Q   | G   | C   | R   | D   | R   |
| AzFRA.1                   | L  | L  | H  | E   | F   | Q   | V   | M   | D   | Y   | R   |
| AzFRA.2                   | L  | L  | H  | T   | Y   | M   | G   | C   | R   | A   | R   |

#### Supplementary Sequence 1 The sequence of TyrRSs from giant viruses

##### *Acanthamoeba castellanii mamavirus*

MENTDYTNNEHRLNQLLSIAEECETLDRKQLVDSGRIFTAYNGFEPSGRIHIAQALITVMNTNKKIECGGQMIIYIAD  
WFAKMNLKMNGDINKIRELGRYFIEVFKACGINLDGTRFIWASEFIASNPYSIERMLDIAEFSTISRVKRCCQIMGRNE  
SDCLKASQIFPCMQAADVFEVLVPEGIDICQLGIDQRKVNMLAIEYANDRGLKIPISLSHHMLMSLSGPKKKMSKSD  
PQGAIFMDDTEQEVSEKISRAYCTDEIFDNPIFEYIKYLLLRWFGTLNLGKIYTDIESIQEDFSSMNKRELKTDVANYI  
NTIIDLVREHFKKPELSELLSNVKSYYQPSK

##### *Acanthamoeba castellanii mimivirus*

MENTDHTNNEHRLTQLLSIAEECETLDRKQLVDSGRIFTAYNGFEPSGRIHIAQALITVMNTNNIECGGQMIIYIAD  
WFAKMNLKMNGDINKIRELGRYFIEVFKACGINLDGTRFIWASEFIASNPYSIERMLDIAEFSTISRVKRCCQIMGRNE  
SDCLKASQIFPCMQAADVFEVLVPEGIDICQLGIDQRKVNMLAIEYANDRGLKIPISLSHHMLMSLSGPKKKMSKSD  
PQGAIFMDDTEQEVSEKISRAYCTDETFDNPIFEYIKYLLLRWFGTLNLGKIYTDIESIQEDFSSMNKRELKTDVANYI  
NTIIDLVREHFKKPELSELLSNVKSYYQPSK

##### *Acanthamoeba polyphaga lentillevirus*

MENTDYTNNEHRLNQLLSIAEECETLDRKQLVDSGRIFTAYNGFEPSGRIHIAQALITVMNTNKKIECGGQMIIYIAD  
WFAKMNLKMNGDINKIRELGRYFIEVFKACGINLDGTRFIWASEFIASNPYSIERMLDIAEFSTISRVKRCCQIMGRNE

SDCLKASQIFYPCMQAADVFEVLPEGIDICQLGIDQRKVNMLAIEYANDRGLKIPISLSHHMLMSLSGTKKKMSKSD  
PQGAIFMDDTEQEVSEKISRAYCTDEIFDNPIFEYIKYLLLRWFGTLNLGKIYTDIESIQEDFSSMNKRELKTDVANYI  
NTIIDLVREHFKKPELSELLSNVKSQQPSK

*Acanthamoeba polyphaga mimivirus*

MENTDHTNNEHRLTQLLSIAEECETLDRLKQLVDSGRIFTAYNGFEPSGRIHIAQALITVMNTNIIIECGQMIIYIAD  
WFAKMNLKMNGDINKIRELGRYFIEVFKACGINLDGTRFIWASEFIASNPSYIERMLDIAEFSTISRVKRCCQIMGRNE  
SDCLKASQIFYPCMQAADVFEVLPEGIDICQLGIDQRKVNMLAIEYANDRGLKIPISLSHHMLMSLSGPKKKMSKSD  
PQGAIFMDDTEQEVSEKISRAYCTDETFDNPIFEYIKYLLLRWFGTLNLGKIYTDIESIQEDFSSMNKRELKTDVANYI  
NTIIDLVREHFKKPELSELLSNVKSQQPSK

*Acanthamoeba polyphaga moumouvirus*

MEQQILSTEEKITRLISICEECETPDRLEELIKSGKKFTAYNGFEPSGRIHIAQALITVMNTNEIISCGGRMIIYIADLFAK  
MNKKMDSDLKIKDVGLYFIEVFKACGINMSETKFIWSSDLFNKNPEKYFTRLLDISEETSLRSKRCCQIMGRKDG  
ELSVSQIYPCMQVADIFELEPEGIDICQLGVDQRKVNMLALEYAKKNGLKVPVILSHHMLMGLGGPKNKMSKSDP  
KSAIFMEDSYEEIKEILRAFCTDDINENPIFEYIKHILFRWYGKLELCGKNYDNMSDIEKDFCDMNKRELKNNVAEY  
INKIIEPVRIHFQQPHLKNLLDKVSSYRVTK

*Cafeteria roenbergensis virus BV-PW1*

MNQFKELLTNVENISLIYNDSNRMFTMKSHLLYFLTRFKNSDIVKIIKDNLYFMLDEISSDNYLDIYDKFIKEYQ  
IYDLDYDNFIDQRVQNLLSISEECDTIDRLKELVESFKNFTAYNGFEPSGRIHIAQALITVMNTNTIIQNGGSMIIYIAD  
WFAQMNHKMGGDLEKIRDVGKYFIEVFKACGINMSGTKFIWASEFFNDNATKYFERMLHIANQTSARAKRCCQI  
MGRREGDELSSSQIYPCMQVADIFELNPNIDICQLGVDQRKVNMLAIEYAKRNNLKTPIILSHHMLMGLKGSKN  
KMSKSDPENAIFMEDSREDIFKKIHKAYCTDEIIDNPIEYIKYILLRWFGTITLCGQKYNIDINKNFATMLKKDLK  
NDVADYIDYILEPVRRHFQDPQMAELYSRVRSYTN

*Catovirus CTV1*

MNIQENIKTIKSIGEEIIGGDSLERLLTHKQRVYAYDGFEPSGRMHIAQGLLRTHNVNKFIDSGVHFVFWVADWFAL  
MNLKLGGDIKKIQQAGKDMILMWKACDMNLDKVDKDGKNMIEFLWSSEEINKRPDEYWKVLVDIATKFSLNRIK  
KCTQIMGRKEEDEIFNTILDNDKIVDLFNNCDFEQKKDDILGLLKLLDTKLDELAASQIFYPVMQCADVFFLGI  
DIASLGMDQRKVNTLALEYCDKIKRKNKPIISHHMLKGLDGS DKMSKSNPDNTIFMDDSETEIIRKIKKSFCPEGNI  
DKNPLLDWIEHLILPIKKTIVIKTKNDIGEEIDMSFDNANLIADKFKNGYIHPKCLKNAVTTVLVNTLIPIQQKYIALK  
KNDN

*Cotonvirus japonicus*

MDNFRFCAELSQNRDINVINISENEIIEFVDSLYFTNKFEEDRIIDITFIDNQKYL CVTREDVDSNFIPDSTYVIKCH  
DSYVETFDVDVKRVDQLVAISEECDRDLRLDLISGKKFVAYNGFEPSGRIHIAQAVITVLNTNTIENGGRMIIYIA  
DWFAQLNHLKGGDLEKIQNVGRYFIEVFKACGIDTSNTEFIWASEFFAKNPSRYFQRMMDVSINATLARTKRCCQI  
MGRAEGDNLSSSQIYPCMQTADIFELVEGGVDICQLGVDQRKVNMFALDYANSQKLKLPVILSHHMIMGLRGPKH  
KMSKSDPLNAIFMEDTTQEIHDKISKAFCPDTHLDNPIFEYIKYILLRWFGNLTCDNFYTNIDFIIQDFPHFDKKRLK  
TDVANYIDRIIKPVRDHFAQDELKDLYDKVIN

*Edafosvirus sp.*

MSEDKYNIITRNLQEIIIGSDDLKELLKNKNPKIYWGTA PTGRIHIAYFLPLLKIADFLDAGCHVKILIADLHAYLDNM  
KSSLDQLNSRCEYYTHMIKEILKVLNVNLSKLEFVKG TDFQLNKEYTMDVYKAHNMISYNEARHAGA EVVKQTDN  
PNINSLLYPTLQALDEQYLDVDIQFGGNDQRKIFMHARKILPSIGYKKRIYLMNSIIPALSKVSLKDPQQUESTITNKKM  
SSSDNTSKIDVLEDEKSIKKINSTYCLEGDISDNTLLTMSKLLIFPILNRLNQKLIQRPEKYGGNIYDNYTLESDFET  
KKLHPSDLKNGISLFIINLIKPIQIEFQKEELVKLLQKAYS

*Fadolivirus 1*

MELTVDQKYELITRNLQEIKIVDEEIMKKILAA RPLKIYWGTA PTSLCHLGYFAPMFKIIDFLQAGCEVTILIADLHAVL

DNMKSTFEQVDARTKVYTVLIQELLKSLNVDISRLKFVKGTDYQLSKEYTLDMYKAHTLISVSEAKHAGAEVVKQS  
DNPKMTGLLYPTLQALDEQYLGSDAELGGIDQRKIFVHARAIMPALGYKKRFHLMNRMVPGLRFEKTTPLQSVQN  
EQKESLKEKVLVLNSEADEKVLADRLQSLLENNDQSNIQLEKMSSSNADSKISLLDTRNQIRSKINKAYCLPGDVD  
DNCLLTMLDKIVFPVLKLGDFVINRKEEHGGKLVYTNIDDVTDNDFKTEKLHPADLKLGMVDSLDLMMEPLRNA  
FKSKESVQLLNKAYPQK

*Harvovirus sp.*

MQSRYDSITAGVKEVINAKYLKALLEDASYSKGYWGTAAPTGRIHIGYLRAMFVIADLVNANCEVIILLADIHAFLDS  
RKSPQDNQLRTQYYQIMITELLKLLNVDMSKIKFVIGSSFQETKEYMRELLAIANVTNCSNAKDAGTEVVMQSDP  
KLTSLLYPIMQVLDEKYLNADFELGGVDQRKIFTGIDHVRHRTKHKITYLMNSMVPALSGISGDSGVKMSASGSVG  
KLDLLDSPKELLKKIKVYCLQGDIADNTLLQLCKHIVFPLLSRVNMIMIVTKKFDHVESEIKNYEDLENLFASGLHP  
DDFKTSVALTIGELLKPIRDKFLETDMVTLLKKAYDSK

*Hirudovirus strain Sangsue*

MENTDYTNNEHRLNQLLSIAEECETLDRKQLVDSGRIFTAYNGFEPSGRIHIAQALITVMNTNKIIECGQMIIYIAD  
WFAKMNLKMNGDINKIRELGRYFIEVFKACGINLDGTRFIWASEFIASNPYSIERMLDIAEFSTISRVKRCCQIMGRNE  
SDCLKASQIFYPCMQAADVFEVLVPEGIDICQLGIDQRKVNMLAIEYANDRGLKIPISLSHHMLMSLSGPKKKMSKSD  
PQGAIFMDDTEQEVSEKISRAYCTDEIFDNPIFEYIKYLLLRWFGTLNLCGKIYTDIESIQEDFSSMNKRELKTDVANYI  
NTIIDLVREHFKKPELSELLSNVKSYYQPSK

*Hokovirus HKV1*

MNKLTIIDEKRELITKNLQEILGKQELDNLLLQEEIKIYWGTAPTGRIHIGYFIQFLKIVDYIKAGCKVKILIADLHAVLD  
NLKTSMELLNARTEYITMIKEVLLSLNVDLDLIEFVKGSQYQLSQNYTLDVYKLNKISYQEAHAGAEVVKQTQ  
NPTMTGLLYPSLQALDEHYLDVHIQSGGIDQRKIFTARSNLNLGYKKSIIHMTMPVQGLRFNKKEIKNVITKEEK  
LKLLNIDFDLPDNYVDITYKKYINNDTIKDDKMSSSNNDKIDLLDTKNEIKKKINKSYCLPCDVEDNCLMDLLEKV  
IFPVLSYKNQQFIINRKEKFGGIIYDSFDNIKNDFALGKLHPQDFKLGITDSLNYILEPIRNSFETKERKLLLKKAYN

*Homavirus sp.*

MTNLSVDEKYNLITRNLQEVLGSEADIKSILAEPLNIYWGTAATGKIHIYIFQMMKIADYLQAGCNVTILIADLHA  
YLDNMKSSLELINYRTEYITMIQTILITMGVDISRLTFVKGTSFQLESEKYMMDMYRANSMSVKAQAHAGAEVVKQ  
TDNPIMNGLLYPTLQALDEQYLNIDAETSGIDQRKLFAMHAKMIMPKLGYKKRNYFMTEMISGLRFVKKQEQSHSQP  
VKLNRDDIINLLNIESDDALINNLQEMIDKYNKEKELKNNIQLEKMSSSDNNSKIDLLDTKNQIKAKINKCYCLAGD  
IKDNCLMNILEKLLFPMKYGKGLDFIINRPDKYGGPIVYTEFDNVKNDFEKELLHPSDFKMGITDGFDTIIPIRDIFG  
TPELQKLIKQAYP

*Klosneuvirus KNV1*

MELSVDEKFNLITRNLQETILDEVIMKKIIAARPLKVYWGTAPTSAPSVAYFVPMMKIRDLMAGCEVTILIADLHAI  
LDNLKSTFEQVGRSEYITMIKALLTSLNIDVNKIKFVKGTQFQLSKEYTLDMYKAHSLITVNEAKHAGAEVVKQA  
EHPKMTGLMYPTLQALDEQYLGADVEIGGIDQRKLFMHARNIMPQLGYKKRMYLMNKMISGLRTQKQEPKEGEN  
IQDQKMSSSNQDSKIDLLDSKNQLKAKINKAYCFPGDINDNCLLEMLNLFVILHIKGLNFVIERKEEYGGNITYN  
NIDNVKNDFKSEKLHPMDLKQGMINNLDLILDSIRKTFETPEMKKLIKMAYS

*Marseillevirus LCMAC201*

MSNFDLIVKGLHEIVGKDLLEKIAVERVVKVYWGTAAPTGRIHIGYIPLLKIAELVKAGCEVYILIADLHAMLDNLKS  
TEKQVHNRSYYTRTIKNMLTQLNVDLDKVTFILGSTYQTKPEYTMMDMYRLNMLCKVSDARHAGSEVVKQSNNP  
MMTGLLYPSLQALDEEYLHVDAQLGGIDQRKIFMFAREFLPKIGYRKRIHMTMPVPGIRHCASSKMSDSQEKMSA  
SDTKTKLMDLDRNQIKKKIASAFCPGDVTDNSILDILERVFLPKHLKSKDFVIIRREEHGGPITFTNFNKVREAFVA  
EKLHPADLKAGIVHTLDIFIEPVRKEFESREWRQVLKHSYAE

*Marseillevirus LCMAC202*

MSNYDLIVKDLHEIVGEDILKKIAAERTVKVYWGTAAPTGRIHIGYITPLLKIAELVKAGCEVTILIADLHAMLDNLKS

TEKQVHNRSDYYTRIIKNMLTQLNVLDKVTfVRGSSfQFTPEYTMdMYRLNTVCSFHDAQHAGAEVVKQTSNPI  
MTGLLYPSLQALDEEYLHVDAQLGGIDQRKIFMFAREFLPKIGYRKRVHLLTPMVPGLRCCASTQDNEDKMSTSNT  
KTKLDMLDSRNEIKKIAAAYCLPGDITDNSVLDILDRVLFPLLRLHLSKDFIIFRREEHGGPIIFTNFDQVREAFSTQQL  
HPADLKAGT

*Megavirus chiliensis*

MNQFKELLTNVENISLIYNDSdNRVMFTMKSHLLYFLTRfKNSDIVKIIeKdNLKYfMLDEISSdNYLDIYDKfIKEYQ  
IYDLdYDNfIDQRVQNLLSISEECdTIDRLKELVESfKNfTAYNGfEPsGRIHIAQALITVMNTNTIIQNGGSMIIYIAD  
WFAQMNHKMGGDLEKIRDVGKYfIEVfKACGINMSGTKfIWASEfFNDNATKYfERMLHIANQTSLARAKRCCQI  
MGRREGDELSSSQIIYPCMQVADIFELNPNGIDICQLGVDQRKVNMLAIEYAKRNNLKTPIILSHHMLMGLKGSKN  
KMSKSDPENAIfMEDSREDIFKKIHkAYCTDEIIDNPIYeyIKYILLRWFGTITLcGQKYNNIDDINKnfATMLKkDLK  
NDVADYIDYILEPvRRHFQDPQMAELYSRvRSYTN

*Megavirus courdo7-1*

MEQQILSTEEKITRLSICEECETPDRLEELIKSGKKfTAYNGfEPsGRIHIAQALITVMNTNEIISCGGRMIIYIADLFAK  
MNKKMDSdLDKIKDVGLYfIEVfKACGINMSETKfIWSSDLfNKNPEKYfTRLLDISEETSLSRsKRCCQIMGRKdGD  
ELSVSQIIYPCMQVADIFELEPEGIDICQLGVDQRKVNMLALEYAKKNGLKVPVILSHHMLMGLGGPKNKMSKSDP  
KSAfMEDSYEEIKeILRAFCTDDINENPIfEYIKHILfRWYgKLELCGKNYDNMSDIEKDFCDMNKRELKNNVAEY  
INKIIEPVRIHFQQPHLKNLLDKVSSYRVTK

*Megavirus courdo7-2*

MNQFKELLTNVENISLIYNDSdNHVMFTMKSHLSYFLTRfKNSDVVKIIeKdNLKYfMLDEIASdNYLDVYDKfMK  
EYQIYDLdYDNfIDQRVQNLLSISEECdTIDRLKELVESfKNfTAYNGfEPsGRIHIAQALITVMNTNTIIQNGGSMIIYI  
ADWFAQMNHKMGGDLEKIRDVGKYfIEVfKACGINMSGTKfIWASEfFNDNATKYfERMLHIANQTSLARAKRC  
CQIMGRREGDELSSSQIIYPCMQVADIFELNPNGIDICQLGVDQRKVNMLAIEYAKRNNLKTPIILSHHMLMGLKGS  
KNKMSKSDPENAIfMEDSREDIFKKIYkAYCTDEIIDNPIYeyIKYILLRWFGTITLcGQKYNNIDDINKnfATMQKKD  
LKNDVADYIDYILEPvRRHFQDPQMAELYSRvRSYTN

*Megavirus courdo11*

MNQFKELLTNVENISLIYNDSdNHVMFTMKSHLSYFLTRfKNSDVVKIIeKdNLKYfMLDEISSNnyLDIYDKfMKE  
YQIYDLdYDNfIDQRVQNLLSISEECdTIDRLKELVESfKNfTAYNGfEPsGRIHIAQALITV  
MNTNTIIQNGGSMIIYIADWFAQMNHKMGGDLEKIKDVVGKYfIEVfKACGINMSGTKfIWASEfFNDNATKYfERM  
LHIANKTSLARAKRCCQIMGRREGDELSSSQIIYPCMQVADIFELNPNGIDICQLGVDQRKVNMLAIEYAKRNNLKT  
PIILSHHMLMGLKGSKNKMSKSDPENAIfMEDSREDIFKKIHkAYCTDEIIDNPIYeyIKYILLRWFGTITLcGQKYNNI  
DDINKnfATMLKkDLKNDVADYIDYILEPvRRHFQDPQMAELYSRvRSYTN

*Megavirus lba isolate LBA111*

MNQFKELLTNVENISLIYNDSdNHVMFTMKSHLSYFLTRfKNSDVVKIIeKdNLKYfMLDEISSdNYLDIYDKfIKEY  
QIYDLdYDNfIDQRVQNLLSISEECdTIDRLKELVESfKNfTAYNGfEPsGRIHIAQALITVMNTNTIIQNGGSMIIYIA  
DWFAQMNHKMGGDLEKIKDVVGKYfIEVfKACGINMSGTKfIWASEfFNDNATKYfERMLHIANQTSLARAKRCC  
QIMGRREGDELSSSQIIYPCMQVADIFELNPNGIDICQLGVDQRKVNMLAIEYAKRNNLKTPIILSHHMLMGLKGSK  
NKMSKSDPENAIfMEDSREDIFKKIYkAYCTDEIVDNPIYeyIKYILLRWFGTITLcGQKYNNIDDINKnfATMQKKD  
LKNDVADYIDYILEPvRRHFQDPQMAELYSRvRSYTN

*Megavirus vitis*

MNQFKELLTNVENISLIYNDSdNHVMFTMKSHLSYFLTRfKNSDVVKIIeKdNLKYfMLDEIASdNYLDVYDKfIKE  
YHIYDLdYDNfIDQRVQNLLSISEECdTIDRLKELVESfKNfTAYNGfEPsGRIHIAQALITVMNTNTIIQNGGSMIIYI  
ADWFAQMNHKMGGDLEKIRDVGKYfIEVfKACGINMSGTKfIWASEfFNDNATKYfERMLHIANQTSLARAKRC  
CQIMGRREGDELSSSQIIYPCMQVADIFELNPNGIDICQLGVDQRKVNMLAIEYAKRNNLKTPIILSHHMLMGLKGS  
KNKMSKSDPENAIfMEDSREDIFKKIYkAYCTDEIIDNPIYeyIKYILLRWFGTITLcGQKYNNIDDINKnfATMQKKD

LKNDVADYIDYILEPVRRHFQDPQMAELYSRVRSYTN

*Mimivirus Bombay*

MENTDHTNNEHRLTQLLSIAEECETLDRLKQLVDSGRIFTAYNGFEPSGRIHIAQALITVMNTNIIIECGGMIIYIAD  
WFAKMNLKMNGDINKIRELGRYFIEVFKACGINLDGTRFIWASEFIASNPSYIERMLDIAEFSTISRVKRCCQIMGRNE  
SDCLKASQIFYPCMQAADVFELVPEGIDICQLGIDQRKVNMLAIEYANDRGLKIPISLSHHMLMSLSGPKKKMSKSD  
PQGAIFMDDTEQEVSEKISRAYCTDETFDNPIFEYIKYLLLRWFGTLNLCGKIYTDIESIQEDFSSMNKRELKTDVANYI  
NTIIDLVREHFKKPELSELLSNVKSYYQPSK

*Mimivirus LCMiAC01*

MTELTTFDFITRNLEPLVGNDAVRLEIHKDRPLKLYWGTAPTGAPHFGYLVPLRKIADFLKAGCEVTIMFADIHAML  
DNLKTKPDLIQIRITTCYEMIIRILQIFKVPLHLKRFIRGSEFQTSPEYINKFYELTAYTTIKQAIHAGAEEVVKQTSSPKLS  
SVIYPLLQALDEEFLGVDGQGGIDQAKIFMFAKDQLPRIGISKRIHLMNALIPGLKKGGMSSSIPYSKIDFRDTEDEDI  
NRKILGAFSIDGHVGNKGKNCMLAMMEHVITYPTLNGESFMIKRDRLYGGNIKITSYKELEKMFQLNKLSSIDLKIS  
MVPYIQLIKPIRAMISEQSELFDSSACWHAHANVPIHSSSLQSIQSTQLKMTKMTKMTKITKKTIELSLEDKIACELK  
AIQKMEQHIIFFKKKKVEELRRQMGKE

*Mimivirus reunion*

MENTDYTNNEHRLNQLLSIAEECETLDRLKQLVDSGRIFTAYNGFEPSGRIHIAQALITVMNTNIIIECGGMIIYIAD  
WFAKMNLKMNGDINKIRELGRYFIEVFKACGINLDGTRFIWASEFIASNPSYIERMLDIAEFSTISRVKRCCQIMGRNE  
SDCLKASQIFYPCMQAADVFELVPEGIDICQLGIDQRKVNMLAIEYANDRGLKIPISLSHHMLMSLSGPKKKMSKSD  
PQGAIFMDDTEQEVSEKISRAYCTDEIFDNPIFEYIKYLLLRWFGTLNLCGKIYTDIESIQEDFSSMNKRELKTDVANYI  
NTIIDLVREHFKKPELSELLSNVKSYYQPSK

*Mimivirus sp. SH*

MNQFKELLTNVKNISLIYNDNDHHVMFTMKSHLSYFLTRFKNSDVVKIIEKDNLEYFIFDEITSDNYLDIYDKFIKQY  
QIYDLDYDNFIDQVRVQNLLSISEECDTIDRLKELVESFKNFTAYNGFEPSGRIHIAQALITVMNTNTIIKNGGSMIIYIA  
DWFAQMNHKMGGDLEKIRDVGKYFIEVFKACGIDMSGTKFIWASEFFNDNSTKYFERMLHIANQTSLARAKRCCQ  
IMGRREGDELSSSQIYPCMQVADIFELNPNGIDICQLGVDQRKVNMLAIEYAKRNNLKTPIILSHHMLMGLKGSKN  
KMSKSDPENAIFMEDSREDIFKKIYKAYCTDAITDNPYIYIKYILLRWFDVTLCGQKYNNDINKDFATMNKKDL  
KNNVADYIDNIIIEPVRRHFQDPQMAELYSRVRSYTN

*Moumouvirus australiensis*

MEQQTSLSVEEKFTRLISISEECETPDRLEVELINTGKKFTAYNGFEPSGRIHIAQALITVMNTNEIISCGGMTIIYIADLFA  
KMNNKMDSDLDKIDVGLYFIEVFKACGINMSETKFIWSSDLFNKNPEKYFTRLDDISEQTSLSRSKRCCQIMGRKEG  
DELSVSQIYPCMQVADIFELEPEGIDICQLGVDQRKVNMLALEYAKKNGLKVPIILSHHMLMGLGGPKNKMSKSDP  
KSAIFMEDSYEEIKEILRAFCTDDTKDNPIFEYIKYILFRWYGKLELCGKNYNNMDEIEKDFHDMNKRELKNNVAE  
YINKIIEPVRIHFQQPHLKDLEKVSSYRVTK

*Niemeyer virus-1*

MENTDHTNNEHRLTQLLSIAEECETLDRLKQLVDSGRIFTAYNGFEPSGRIHIAQALITVMNTNIIIECGGMIIYIAD  
WFAKMNLKMNGDINKIRELGRYFIEVFKACGINLDGTRFIWASEFIASNPSYIERMLDIAEFSTISRVKRCCQIMGRNE  
SDCLKASQIFYPCMQAADVFELVPEGIDICQLGIDQRKVNMLAIEYANDRGLKIPISLSHHMLMSLSGPKKKMSKSD  
PQGAIFMDDTEQEVSEKISRAYCTDETFDNPIFEYIKYLLLRWFGTLNLCGKIYTDIESIQEDFSSMNKRELKTDVANYI  
NTIIDLVREHFKKPELSELLSNVKSYYQPSK

*Niemeyer virus-2*

MENTDYSNNEHRLNQLLLIAEECETLDRLKQLVDSGKIFTAYNGFEPSGRIHIAQALITVMNTNIIIECGGMIIYIA  
DWFAKMNLKMNGDIEKIRELGRYFIEVFKACGINLGGTKFIWASEFIASNPSYIERMLDIAEFSTLSRVKRCCQIMGR  
NESDCLKASQIFYPCMQAADVFELVPGGIDICQLGIDQRKVNMLAIEYANDRGLKIPISLSHHMLMSLNGPKKKMS  
KSDPQSAIFMDDTEQEINEKISRAYCTDEIFDNPIFEYIKYLLLRWFGTLNLCGKVYTDIKSIEQDFSSMNKRELKTDVA

NYINIIIDLVREHFKKPELSDLLSNIKSYQQSSK

*Orpheovirus IHUMI-LCC2*

MNTYNLITRNLQEYVVGNDLLKKIDNGEDIKVVWGTITGNPHLGYPILKIADLLNAGCKVTILLADLHG YLDN  
LKT DWDLLSLRIEWYELIKEMLRKRVGSLENLKFVTGSTFQLSKEYTLDMYKLSALVTTTAMQHASAEVVKQSKNP  
LLSGLLYPILQALDEKYLGVNVQLGGIDQRKIFMFAREILSEVDYPKSIHLMNPLVPGLGKPVKGNGKNEGNDIEG  
KMSSSDKNSKIDFSDSDEVIKDKMKKAYSVDGQVEGNCLMSMCKLILFPFLELEGRKFVVEREEKYGGDVHFDNYN  
SIEETF GKKE LASMDLKVAIAKEI IKLVNPIRKIVNDNVELMKSAYPTEKN

*Pandoravirus dulcis*

MISDDGDDNSGGKEAAHLPVGNIDPDQGDVEQRYALVVRDLDEVIGDPAEIKAIMAERPLIYWGTA PTGNPHLG Y  
FVPIFKLADFLQAGCRVKILFADVHAHLDN GKTPWDLVEHRCRWYEF AIKAMLQHIGVPLGGLEFVRGTEYQCGG  
AYALDLYRLAAHVRTGT AQKAAAQVVKMDRNP LLSNVLYPLMQALDEQHLDVDAQFGGRDQRKIFAFARDHLP  
VLGYRKR FHLLNPLVPGLTESGKMSASEAASKIGLDDPDEVIRAKIRRAYSVDGCAEGNGLLAILRFVLWRWLEPAG  
LPFVVTRPSEYGGPQTFATYAEVEAAFVRAGVPLVEGGGERLFSVDLKP AVADLLCEFLAPLRGVLAARADLFAAAY  
PV

*Pandoravirus japonicus*

MIDDDDDGGKET AHLPTDDGALDQDDVEQRYALVVRDLDEVIGEP AEIKAIMAERPLAVYWGTA PTGNPHLG YFV  
PIFKLADFLQAGCRVKILFADVHAHLDNA KTPWDLVEHRCRWYEF AIKAMLQHIGVPLDRLEFVRGSDYQHG TAY  
TLDLLRLTARVTVATAQKAAAQVVKMERNP LLSNVLYPLMQALDEEHLDVD AQFGGRDQRKIFAFARDHLPALGY  
RKR VHLLNPLVPGLTKSGKMSASEAASKIGLDDPDEVIRAKIRQAYSVDGCAEGNGLLAILRFVLWRWLEPAGLPFV  
VTRPPEYGGPQTFATYAEVEAAFVRAGVPPAEGDGERLFSVDLKP AVADLLCEFLAPLRGVLAARADLLHAAYPPPS

*Pandoravirus macleodensis*

MDDARDQILQDDKNRAFGASSHTSSSTSTSIQQPAGIIGLPRSRDNIADDDVEYRYGLMTRDLEE VIGDPAEIKAVM  
AERPLVIYWGTA PTGKPHLG YFVPIFKLADFLQAGCRVKILFANVHAHLDN GKTPWGLVEHRCQWYEF AIKAMLQ  
HIGVPLDRLEFVRGTEYQCSSAYTLDLYRLTAQVSTGAAQKAAAQVVKMDRNP LLSNVLYPLMQALDEHHLDVDA  
QFGGRDQRKIFAFARDHLPALGYRKR FHLLNPLVPGLTKDGKMSASEAASKIDLDDAEAIRAKIRRAYSVDGRAEG  
NGLLAILRFVLWRWLEPAGLPFVVTRPAQYGGPLTFATYADVEAAFVRSHTPSPSTDVDGNNNADGGERLCSADLK  
PAIADLLCEFLAPLRGVLGARADLLRAAYPPMPH

*Pandoravirus salinus*

MMDDTDHQHREKTEKSVHSQGGNGSPTPIGVDSTARQQTDGDDVEHRYGLVVRDLDEVIGDPA DIKAIMAERPLC  
IYWGTA PTGKPHLG YFVPIFKLADFLQAGCRVRILFADVHAHLDN GKTPWDLVEHRCRWYEF AIKAMLQHIGVPL  
DRLEFVRGSDYQHGAAYTLDLLRLTARVTVGT AQKAAAQVVKMDRNP LLSNVLYPLMQALDEQHLDVDAQFGG  
RDQRKIFAFARDHLPALGYRKRIHLLNPLVPGLTKDGKMSASEAASKIDLDDCDEVIRAKIRRAYSVDGRAEGNGLL  
AILRFILWRWLEPAGLPFVVTRPREYGGPLTFATYADVEAAFVRAGVPLSETGGDGDRLFSVDLKP AVADLLCEFLAP  
LRGVLAARADLLATAYPSAP

*Samba virus*

MENTDHTNNEHRLTQLLSIAEECETLDR LKQLVDSGRIFTAYNGFEP SGRIHIAQALITVMNTN NIECGGMIIYIAD  
WFAKMNLKMNGDINKIRELGRYFIEVFKACGINLDGTRFIWASEFIASNP SYIERMLDIAEFSTISR VKRCCQIMGRNE  
SDCLKASQIFYPCMQAADVFELVPEGIDICQLGIDQRKVNMLAIEYANDRGLKIPISLSHHMLMSLSGPKKKMSKSD  
PQGAIFMDDETEQEVSEKISRAYCTDETFDNPIFEYIKYLLLRWFGTLNL CGKIYTDIESIQEDFSSMNKRELKTDVANYI  
NTIIDLVREHFKKPELSELLSNVKS YQQPSK

*Saudi moumouvirus*

MEQQILSTEEKITRLSICEECETPDRL EELIKSGKKFTAYNGFEP SGRIHIAQALITVMNTNEIISCGGRMIIYIADLFAK  
MNKKMDSDLDKIKDVGLYFIEVFKACGINMSETKFIWSSDLFNKNPEKYFTRLLDISEETSLSRSKRCCQIMGRKDGD



ELSVSQIIYPCMQVADIFELEPEGIDICQLGVDQRKVNMLALEYAKKNGLKVPVILSHHMLMGLGGPKNKMSKSDP  
KSAIFMEDSYEEIKEILRAFCTDDINENPIFEYIKHILFRWYGKLELCGKNYDNMSDIEKDFCDMNKRELKNNVAEY  
INKIIEPVRIHFQQPHLKNLLDKVSSYRVTK

*Terrestriovirus sp.*

MNPQEQYDLISHRISPDDIVGKSYLMEKLQAGKQLKGYVGFAPTGRCHIGYASLLLKVAQCLDAGCEIILLADVHA  
FLDARKSGLEDEAKTEYYQMITELLRLNADLSKVFKVGSEYQYSKPYMQDLLRLNTISISKAKHAGADVVKQ  
AEDPLLSLVYPLMQSLDETHLDPDLDFELSGTDQRHIFMFSVDYVNKSKNKKMTYIMNQLVPGLSKESLRNPETKV  
VTSQKMSSSDSVGKLDLLDTPKEILNKLKKAYCLEGDAEDNTVLVMCKHIIFPVLERLNKQFVIARDEKYGGNLVIN  
SHDELYALFADKSIHPSDLKKSANIITDLFEPIRQHFSTNDMVKLLEQAYGK

*Tupanvirus deep ocean*

MEIPDDKLSLITSRLQEIIGLDELQKIIQSRPLKIYFGTAPTGRIHIGYLVPLLKIADFLKAGCEVKILFADLHAVLDNLKS  
TMQQVEFRTSYYEKMISILKNLNVPLDKLTFVRGSSSQAYTMDMYKISTLATLHDAKKAGAEVVKQTDNPKM  
SGLLYPILQALDEQYLDVDAQFGGVDQRKLFTFAADVLPLIGYKKRIHLMNPMLTAINAMPKDSNENTNISEIKMSS  
SDLNSKIDMLDSKNEIKKKINRAYCLEGDLNPLMELMKHVTFPLNLCGSSIFKINRKEIHGGPLSFSNYADLEKD  
FVEKKLHPQDLKTGIIDCLNLFMEPIRAEFNDKESQSLIKQAYN

*Tupanvirus soda lake*

MEVVQDKISLITSRLQEVIGIDELQNIKSRPLKIYWGTAPTGKVHIGYLVPLLKIADFLKSGCEVKILFADLHAVLDNL  
KSTSQQVEYRTIYYEKMIAKILKNLNVSLEKLTFFVGSSQLTQSYTMDMYKISTLATLHDAKKAGAEVVKQTDNPK  
MSGLLYPILQALDEQYLDVDAQFGGIDQRKLFTFAADVLPLIGYNKRIHLMNPMLTAINAMPKNINEDTNLSEVKM  
SSSDLNSKIDMMDSKNEVKKINRAYCLEGDLNPLMELMKLVIFPLDNCNINIFTINRHEKYGGPLNYSNFEELE  
KDFVQKTLHPQDLKMGIIIDCLNFMPIRQEFSDKETQQLIKKAYN

**Supplementary Sequence 2 The plasmid sequences used in this work**

**pEvoLe-MjTyrRS(wt)**

TCCTGAAAATCTCGATAACTCAAAAAATACGCCCGGTAGTGATCTTATTTTCATTATGGTGAAAAGTTGGAACCTCTTAC  
GTGCCGATCAACGTCTCATTTTCGCCAAAAGTTGGCCCAGGGCTTCCCGGTATCAACAGGGACACCAGGATTTATTT  
ATTCTGCGAAGTGATCTTCCGTCACAGGTATTTATTCGGCGCAAAGTGCGTCGGGTGATGCTGCCAACTTACTGATT  
TAGTGATGATGGTGTTTTGAGGTGCTCCAGTGGCTTCTGTTTCTATCAGCTGTCCCTCCTGTTACGCTACTGACGG  
GGTGGTGCGTAACGGCAAAAGCACCGCCGGACATCAGCGCTAGCGGAGTGATACTGGCTTACTATGTTGGCACTG  
ATGAGGGTGTCAGTGAAGTGCTTCATGTGGCAGGAGAAAAAGGCTGCACCGGTGCGTCAGCAGAAATATGTGATA  
CAGGATATATTCCGCTTCTCGCTCACTGACTCGCTACGCTCGGTGCTTCGACTGCGGCGAGCGGAAATGGCTTACG  
AACGGGGCGGAGATTTCTGGAAGATGCCAGGAAGATACTTAACAGGGAAGTGAGAGGGCCGCGGCAAAAGCCGTT  
TTTCATAGGCTCCGCCCCCTGACAAGCATCACGAAATCTGACGCTCAAATCAGTGGTGGCGAAACCCGACAGGA  
CTATAAAGATAACCAGGCGTTTCCCCCTGGCGGCTCCCTCGTGCGCTCTCCTGTTCTGCTTTTCGGTTTACCGGTGTC  
ATTCCGCTGTTATGGCCGCGTTTGCTCATTCACGCCTGACACTCAGTTCCGGGTAGGCAGTTCGCTCCAAGCTGG  
ACTGTATGCACGAACCCCCCGTTAGTCCGACCGCTGCGCCTTATCCGGTAACATATCGTCTTGAGTCCAACCCGAA  
AGACATGCAAAAGCACCACTGGCAGCAGCCACTGGAATTGATTAGAGGAGTAGTCTTGAAGTCATGCGCCGGT  
TAAGGCTAAACTGAAAGGACAAGTTTTGGTGACTGCGCTCCTCCAAGCCAGTTACCTCGGTTCAAAGAGTTGGTAG  
CTCAGAGAACCTTCGAAAAACCGCCCTGCAAGGCGGTTTTTCGTTTTTCAGAGCAAGAGATTACGCGCAGACCAAA  
ACGATCTCAAGAAGATCATCTTATTAATCAGATAAAATATTTCTAGATTTAGTGCAATTTATCTCTTCAAATGTAGC  
ACCTGAAGTCAGCCCCATACGATATAAGTTGTAATTCTCATGTTTGACAGCTTATCATCGATAAGCTTGGTACCCAAT  
TATGACAACCTTGACGGCTACATCATTCACTTTTCTTCAACCGGCACGGAACCTCGCTCGGGCTGGCCCCGGTGCA  
TTTTTAAATACCCGCGAGAAATAGAGTTGATCGTCAAAACCAACATTGCGACCGACGGTGGCGATAGGCATCCGG

GTGGTGCTCAAAAAGCAGCTTCGCCTGGCTGATACGTTGGTCTCGCGCCAGCTTAAGACGCTAATCCCTAACTGCTG  
GCGGAAAAGATGTGACAGACGCGACGGCGACAAGCAAACATGCTGTGCGACGCTGGCGATATCAAAATTGCTGTC  
TGCCAGGTGATCGCTGATGTAAGCTCGCTACCCGATTATCCATCGGTGGATGGAGCGACTCGTTAATCG  
CTTCCATGCGCCGAGTAACAATTGCTCAAGCAGATTATCGCCAGCAGCTCCGAATAGCGCCCTTCCCTTGCCCCG  
GCGTTAATGATTTGCCCAAACAGGTCGCTGAAATGCGGCTGGTGCGCTTCATCCGGGCGAAAGAACCCCGTATTGG  
CAAATATTGACGGCCAGTTAAGCCATTATGCCAGTAGGCGCGCGGACGAAAGTAAACCCACTGGTGATACCATTTC  
GCGAGCCTCCGGATGACGACCGTAGTGATGAATCTCTCCTGGCGGGAACAGCAAAATATCACTCGGTGCGCAAACA  
AATTCTCGTCCCTGATTTTTACCACCCCTGACCGCAATGGTGAGATTGAGAATATAACCTTTCATTCCCAGCGG  
TCGGTCGATAAAAAAATCGAGATAACCGTTGGCCTCAATCGGCGTTAAACCCGCCACCAGATGGGCATTAAACGAG  
TATCCCGGCAGCAGGGGATCATTTTGCGCTTCAGCCATACTTTTCATACTCCCGCCATTAGAGAAGAAACCAATTG  
TCCATATTGCATCAGACATTGCCGTCACTGCGTCTTTACTGGCTCTTCTCGCTAACCAAAACCGGTAACCCCGCTTAT  
TAAAAGCATTCTGTAAACAAAGCGGGACCAAAGCCATGACAAAAACGCGTAACAAAAGTGTCTATAATCACGGCAG  
AAAAGTCCACATTGATTATTTGCACGGCGTCACACTTTGCTATGCCATAGCATTTTTATCCATAAGATTAGCGGATCC  
TACCTGACGCTTTTTATCGCAACTCTCTACTGTTTCTCCATACCCGTTTTTTTTGGGCTAACAGGAGGAATTAGATCTAT  
GGACGAATTTGAAATGATAAAGAGAAACACATCTGAAATTATCAGCGAGGAAGAGTTAAGAGAGGTTTTAAAAAA  
AGATGAAAAATCTGCTTACATAGGTTTTGAACCAAGTGGTAAAAATACATTTAGGGCATTATCTCCAAATAAAAAAGA  
TGATTGATTTACAAAATGCTGGATTGATATAATTATATTGTTGGCTGATTACACGCCTATTTAAACCAGAAAGGAG  
AGTTGGATGAGATTAGAAAAATAGGAGATTATAACAAAAAAGTTTTGAAGCAATGGGGTTAAAGGCAAAAATATGT  
TTATGGAAGTGAATTCCAGCTTGATAAGGATTATACACTGAATGTCTATAGATTGGCTTTAAAAACTACCTTAAAAAG  
AGCAAGAAGGAGTATGGAACCTATAGCAAGAGAGGATGAAAATCCAAAGTTGCTGAAGTTATCTATCCAATAATG  
CAGGTTAATGATATTCAATTATTTAGGCGTTGATGTTGCAGTTGGAGGGATGGAGCAGAGAAAAATACACATGTTAGC  
AAGGGAGCTTTTACCAAAAAAGGTTGTTTGATTACAAACCCTGTCTTAACGGGTTTGATGGAGAAGGAAAGATG  
AGTTCTTCAAAAGGGAATTTATAGCTGTTGATGACTCTCCAGAAGAGATTAGGGCTAAGATAAAGAAAGCATACTG  
CCCAGCTGGAGTTGTTGAAGGAAATCCAATAATGGAGATAGCTAAATACTTCCTTGAATATCCTTTAACCATAAAAA  
GGCCAGAAAAATTTGGTGAGATTTGACAGTTAATAGCTATGAGGAGTTAGAGAGTTTATTTAAAAATAAGGAATTG  
CATCCAATGGATTTAAAAAATGCTGTAGCTGAAGAACTATAAAGATTTTAGAGCCAATTAGAAAGAGATTATAAGT  
CGACCATCATCATCATCATATTGAGTTTAAACGGTCTCCAGCTTGGCTGTTTTGGCGGATGAGAGAAGATTTTCAG  
CCTGATACAGATTAAATCAGAACGCAGAAGCGGTCTGATAAAACAGAATTTGCCTGGCGGCAGTAGCGCGGTGGTC  
CCACCTGACCCCATGCCGAACCTCAGAAGTGAAACGCCGTAGCGCCGATGGTAGTGTTGGGTCTCCCATGCGAGAG  
TAGGGAACCTGCCAGGCATCAATAAAACGAAAGGCTCAGTCGAAAGACTGGGCCTTGTTGTGAGCTCCCGGTCAAT  
CACTGCAGTTTCAAACGCTAAATTGCCTGATGCGCTACGCTTATCAGGCCTACATGATCTCTGCAATATATTGAGTTT  
GCGTGCTTTTGTAGCCCGGATAAGGCGTTCACGCCGCATCCGGCAAGAAACAGCAAAACATCCAAAACGCCGCGTT  
CAGCGGCGTTTTTCTGCTTTTCTTCGCAATTAATCCGCTTCGCAACATGTGAGCACCGGTTTATTGACTACCGGA  
AGCAGTGTGACCGCAGCTCAGGGTCGAATTTGCTTTTGAATTTCTGCCATTATCCGCTTATTATCACTTATTCAGGC  
GTAGCACCAAGCGTTTAAAGGGCACCAATAACTGCCTTAAAAAAATTACGCCCCGCCCTGCCACTCATCGCAGTACTG  
TTGTAATTCATTAAGCATTCTGCCGACATGGAAGCCATCACAGACGGCATGATGAACCTGAATCGCCAGCGGCATC  
AGCACCTGTGCGCTTGGCTATAATTTGCCCATGGTGAAAACGGGGGCGAAGAAGTTGTCCATATTGGCCACGTT  
TAAATCAAAAAGTGGTGAACCTACCCAGGGATTGGCTGAGACGAAAAACATATTCTCAATAAACCCCTTAGGGAAA  
TAGGCCAGGTTTTACCGTAACACGCCACATCTTGCGAATATATGTGTAGAACTGCCGGAATCGTCGTGGTATTC  
ACTCCAGAGCGATGAAAACGTTTCAGTTTGCTCATGAAAACGGTGTAACAAGGTGAACACTATCCCATATCACC  
AGCTACCGCTCTTTCATTGCCATACGGAATTCGGATGAGCATTCATCAGGCGGGCAAGAATGTGAATAAAGGCCG  
GATAAACTTGTCCTATTTTTCTTTACGGTCTTTAAAAAGGCCGTAATATCCAGCTGAACGGTCTGGTTATAGGTAC  
ATTGAGCAACTGACTGAAATGCCTCAAAATGTTCTTTACGATGCCATTGGGATATATCAACGGTGGTATATCCAGTG  
ATTTTTTCTCCATTTTAGCTTCCTTAGC

**pEvoLe-MjTyrRS(wt)-Loop1**

TCCTGAAAATCTCGATAACTCAAAAAATACGCCCGGTAGTGATCTTATTTTCATTATGGTGAAAAGTTGGAACCTCTTAC  
GTGCCGATCAACGTCTCATTTCGCCAAAAGTTGGCCACGGGCTTCCCGGTATCAACAGGGACACCAGGATTATTT  
ATTCTGCGAAGTGATCTTCCGTCACAGGTATTTATTCGGCGCAAAGTGCGTCGGGTGATGCTGCCAACTTACTGATT  
TAGTGATGATGGTGTTCCTGAGGTGCTCCAGTGGCTTCTGTTTCTATCAGCTGTCCCTCCTGTTACGCTACTGACGG  
GGTGGTGCCTAACGGCAAAAGCACCGCCGGACATCAGCGCTAGCGGAGTGATATACTGGCTTACTATGTTGGCACTG  
ATGAGGGTGTCACTGAAGTGCTTCATGTGGCAGGAGAAAAAAGGCTGCACCGGTGCGTCAGCAGAAATATGTGATA  
CAGGATATATTCCGCTTCTCGCTCACTGACTCGCTACGCTCGGTCTGACTGCGGCGAGCGGAAATGGCTTACG  
AACGGGGCGGAGATTTCTGGAAGATGCCAGGAAGATACTTAACAGGGAAAGTGAGAGGGCCGCGGCAAAAGCCGTT  
TTTCATAGAGCTCCGCCCCCTGACAAGCATCACGAAATCTGACGCTCAAATCAGTGGTGGCGAAAACCCGACAGGA  
CTATAAAGATAACAGCGCTTTCCTGCGGCTCCCTCGTGCGCTCTCTGTTCTGCTTTTCGGTTTACCGGTGTC  
ATTCCGCTGTTATGGCCGCGTTTGCTCATTCCACGCCTGACACTCAGTTCGGGTAGGCAGTTCGCTCCAAGCTGG  
ACTGTATGCAGAACCCCCGTTCACTCCGACCGCTGCGCCTTATCCGGTAACATATCGTCTTGAGTCCAACCCGGAA  
AGACATGCAAAAAGCACCACTGGCAGCAGCCACTGGTAATTGATTTAGAGGAGTTAGTCTTGAAGTCATGCGCCGGT  
TAAGGCTAAACTGAAAGGACAAGTTTGGTGACTGCGCTCCTCCAAGCCAGTTACCTCGGTCAAAGAGTTGGTAG  
CTCAGAGAACCTTCGAAAAACCGCCCTGCAAGGCGGTTTTTCGTTTTTCAGAGCAAGAGATTACGCGCAGACCAAA  
ACGATCTCAAGAAGATCATCTTATTAATCAGATAAAATATTTCTAGATTTCACTGCAATTTATCTCTTCAAATGTAGC  
ACCTGAAGTCAGCCCCATACGATATAAGTTGTAATTCTCATGTTTGACAGCTTATCATCGATAAGCTTGGTACCCAAT  
TATGACAACTTGACGGCTACATCATTCACTTTTTCTTCACAACCGGCACGGAACCTCGCTCGGGCTGGCCCCGGTGCA  
TTTTTAAATACCCGCGAGAAATAGAGTTGATCGTCAAAAACCAACATTGCGACCGACGGTGGCGATAGGCATCCGG  
GTGGTGCTCAAAAGCAGCTTCGCCTGGCTGATACGTTGGTCTCGCGCCAGCTTAAGACGTAATCCCTAACTGCTG  
GCGGAAAAGATGTGACAGACGCGACGGCGACAAGCAAACATGCTGTGCGACGCTGGCGATATCAAAATTGCTGTC  
TGCCAGGTGATCGCTGATGTAAGCTGACAGCCTCGCGTACCCGATTATCCATCGGTGGATGGAGCGACTCGTTAATCG  
CTTCCATGCGCCGAGTAACAATTGCTCAAGCAGATTATCGCCAGCAGCTCCGAATAGCGCCCTTCCCTTGCCCCG  
GCGTTAATGATTTGCCCAAACAGGTCGCTGAAATGCGGCTGGTGCGCTTATCCGGGCGAAAGAACCCCGTATTGG  
CAAATATTGACGGCCAGTTAAGCCATTATGCCAGTAGGCGCGCGGACGAAAGTAAACCCACTGGTGATACCATTG  
GCGAGCCTCCGGATGACGACCGTAGTGATGAATCTCTCTGCGGGAACAGCAAAATATCACTCGGTGCGCAAACA  
AATTCTCGTCCCTGATTTTTACCAACCCCTGACCGCAATGGTGAGATTGAGAATATAACCTTTCATTCCCAGCGG  
TCGGTCGATAAAAAATCGAGATAACCGTTGGCCTCAATCGGCGTTAAACCCGCCACCAGATGGGCATTAAACGAG  
TATCCCGGCAGCAGGGGATCATTTTGCGCTTACGCCATACTTTTCATACTCCCGCCATTAGAGAAAGAAACCAATTG  
TCCATATTGCATCAGACATTGCCGTCACTGCGTCTTTTACTGGCTCTTCTCGCTAACCAAAACCGGTAACCCCGCTTAT  
TAAAAGCATTCTGTAACAAAGCGGGACCAAGCCATGACAAAAACGCGTAACAAAAGTGTCTATAATCACGGCAG  
AAAAGTCCACATTGATTATTTGCACGGCGTCACACTTTGCTATGCCATAGCATTTTTATCCATAAGATTAGCGGATCC  
TACCTGACGCTTTTATCGCAACTCTCTACTGTTTCTCCATACCCGTTTTTTTGGGCTAACAGGAGGAATTAGATCTAT  
GGACGAATTTGAAATGATAAAGAGAAAAACATCTGAAATTATCAGCGAGGAAGAGTTAAGAGAGGTTTTAAAAAA  
AGATGAAAAATCTGCTTACATAGGTTTTGAACCAAGTGGTAAAAATACATTTAGGGCATTATCTCCAAATAAAAAAGA  
TGATTGATTACAAAATGCTGGATTGATATAATTATATTGTTGGCTGATTACACGCCTATTTAAACCAGAAAGGAG  
AGTTGGATGAGATTAGAAAAATAGGAGATTATAACAAAAAAGTTTTTGAAGCAATGGGGTTAAAGGCAAAATATGT  
TTATGGAAGTGAATTCCAGCTTGATAAGGATTATACACTGAATGTCTATAGATTGGCTTTAAAAACTACCTTAAAAAG  
AGCAAGAAGGAGTATGGAACCTTAGCAAGAGAGGATGAAAAATCCAAAGGTTGCTGAAGTTATCTATCCAATAATG  
CAGGTTAATGATTTCAATTATTTAGGCGTTGATGTTGCAGTTGGAGGGATGGAGCAGAGAAAAATACACATGTTAGC  
AAGGGAGCTTTTACCAAAAAAGGTTGTTTGTATTACAACCTGTCTTAACGGGTTTGATGGAGAAGGAAAGATG  
AGTTCTTCAAAAGGGAATTTTATAGCTGTTGATGACTCTCAGAAAGAGATTAGGGCTAAGATAAAGAAAGCATACTG  
CCCAGCTGGAGTTGTTGAAGGAAATCCAATAATGGAGATAGCTAAATACTTCCTGAATATCCTTTAACCCCTGTGCG

GCTTGACAGTTAATAGCTATGAGGAGTTAGAGAGTTTATTTAAAAATAAGGAATTGCATCCAATGGATTTAAAAAAT  
GCTGTAGCTGAAGAACTTATAAAGATTTTAGAGCCAATTAGAAAAGAGATTATAAGTCGACCATCATCATCATCA  
TTGAGTTTAAACGGTCTCCAGCTTGGCTGTTTTGGCGGATGAGAGAAGATTTTCAGCCTGATACAGATTAAATCAGA  
ACGCAGAAGCGGTCTGATAAAACAGAAATTTGCCTGGCGGCAGTAGCGCGGTGGTCCCACCTGACCCCATGCCGAA  
CTCAGAAGTGAAACGCCGTAGCGCCGATGGTAGTGTGGGTCTCCCCATGCGAGAGTAGGGAAGTCCAGGCATC  
AAATAAACGAAAGGCTCAGTCGAAAGACTGGGCCTTGTGTGAGCTCCCGGTATCACTGCAGTTTCAAACGCT  
AAATTGCCTGATGCGCTACGCTTATCAGGCCTACATGATCTCTGCAATATATTGAGTTTGCCTGCTTTTGTAGGCCGG  
ATAAGGCGTTCACGCCGCATCCGGCAAGAAACAGCAAAACAATCCAAAACGCCGCGTTCAGCGCGTTTTTCTGCT  
TTTCTTCGCGAATTAATTCCGCTTCGCAACATGTGAGCACCGGTTTATTGACTACCGGAAGCAGTGTGACCGCAGCT  
CAGGGTCGAATTTGCTTTCGAATTTCTGCCATTATCCGCTTATTATCACTTATCAGGCGTAGCACAGGCGTTAA  
GGGCACCAATAACTGCCTTAAAAAAATTACGCCCCGCCCTGCCACTCATCGCAGTACTGTTGTAATTCATTAAGCAT  
TCTGCCGACATGGAAGCCATCACAGACGGCATGATGAACCTGAATCGCCAGCGGCATCAGCACCTTGTGCCTTGC  
GTATAATATTTGCCCATGGTGAAAACGGGGCGAAGAAGTTGTCCATATTGGCCACGTTAAATCAAACTGGTGAA  
ACTCACCCAGGGATTGGCTGAGACGAAAAACATATTCTCAATAAACCCCTTAGGGAAATAGGCCAGGTTTTACCGT  
AACACGCCACATCTTGCGAATATATGTGTAGAACTGCCGGAATCGTCGTGGTATTCACTCCAGAGCGATGAAAA  
CGTTTCAGTTTGCTCATGAAAACGGTGTAACAAGGGTGAACACTATCCCATATCACCAGCTCACCCTCTTCATTG  
CCATACGGAATTCGGGATGAGCATTATCAGGCGGGCAAGAATGTGAATAAAGGCCGATAAACTTGTGCTTATTT  
TTCTTTACGGTCTTTAAAAAGGCCGTAATATCCAGCTGAACGGTCTGGTTATAGGTACATTGAGCAACTGACTGAAA  
TGCCTCAAAATGTTCTTTACGATGCCATTGGGATATATCAACGGTGGTATATCCAGTGATTTTTTCTCCATTTAGCT  
TCCTTAGC

**pEvoLe-MjTyrRS(wt)-Loop2**

TCCTGAAAATCTCGATAACTCAAAAAATACGCCCGGTAGTGATCTTATTTCAATTATGGTGAAAGTTGGAACCTCTTAC  
GTGCCGATCAACGTCTCATTTTCGCCAAAAGTTGGCCAGGGCTTCCCGGTATCAACAGGGACACCAGGATTTATTT  
ATTCTGCGAAGTGATCTTCCGTCACAGGTATTTATTGGCGCAAAGTGCGTCGGGTGATGCTGCCAACTTACTGATT  
TAGTGATGATGGTGTTTTTGAGGTGCTCCAGTGGCTTCTGTTTCTATCAGCTGTCCCTCCTGTTACGCTACTGACGG  
GGTGGTGCGTAACGGCAAAAGCACCGCCGGACATCAGCGCTAGCGGAGTGATACTGGCTTACTATGTTGGCACTG  
ATGAGGGTGTCAGTGAAGTGCTTCATGTGGCAGGAGAAAAAAGGCTGCACCGGTGCGTCAGCAGAATATGTGATA  
CAGGATATATTCCGCTTCTCGCTCACTGACTCGCTACGCTCGGTGCTTCGACTGCGGCGAGCGGAAATGGCTTACG  
AACGGGGCGGAGATTTCTGGAAGATGCCAGGAAGATACTTAACAGGGAAGTGAGAGGGCCGCGGCAAAAGCCGTT  
TTTCCATAGGCTCCGCCCCCTGACAAGCATCACGAAATCTGACGCTCAAATCAGTGGTGGCGAAAACCCGACAGGA  
CTATAAAGATAACCAGGCGTTTCCCCCTGGCGGCTCCCTCGTGCGCTCTCCTGTTCTGCCTTTCCGTTTACCAGGTGTC  
ATTCCGCTGTTATGGCCGCGTTTGTCTCATTCCACGCCTGACACTCAGTTCCGGGTAGGCAGTTCGCTCCAAGCTGG  
ACTGTATGCACGAACCCCCGTTCACTCCGACCGCTGCGCCTTATCCGGTAACTATCGTCTTGAGTCCAACCCGGAA  
AGACATGCAAAAAGCACCACTGGCAGCAGCCACTGGTAATTGATTTAGAGGAGTTAGTCTTGAAGTCATGCGCCGGT  
TAAGGCTAAACTGAAAGGACAAGTTTTGGTGACTGCGCTCCTCCAAGCCAGTTACCTCGGTTCAAAGAGTTGGTAG  
CTCAGAGAACCTTCGAAAAACCGCCCTGCAAGGCGGTTTTTTCGTTTTTCAGAGCAAGAGATTACGCGCAGACCAAA  
ACGATCTCAAGAAGATCATCTTATTAATCAGATAAAATATTCTAGATTTCACTGCAATTTATCTCTTCAAATGTAGC  
ACCTGAAGTCAGCCCCATACGATATAAGTTGTAATTCTCATGTTTGACAGCTTATCATCGATAAGCTTGGTACCCAAT  
TATGACAACTTGACGGCTACATCATTTCACTTTTTCTTCAACCCGGCACGGAAGTCTGCTCGGGCTGGCCCCGGTGCA  
TTTTTTAAATACCCGCGAGAAATAGAGTTGATCGTCAAAAACCAACATTGCGACCGACGGTGGCGATAGGCATCCGG  
GTGGTGCTCAAAAGCAGCTTCGCCTGGCTGATACGTTGGTCTCGCGCCAGCTTAAGACGCTAATCCCTAACTGCTG  
GCGGAAAAGATGTGACAGACGCGACGGCGACAAGCAAACATGCTGTGCGACGCTGGCGATATCAAAATTGCTGTC  
TGCCAGGTGATCGCTGATGTACTGACAAGCCTCGCGTACCCGATTATCCATCGGTGGATGGAGCGACTCGTTAATCG  
CTTCCATGCGCCGAGTAACAATTGCTCAAGCAGATTATCGCCAGCAGCTCCGAATAGCGCCCTTCCCTTGCCCCG

GCGTTAATGATTTGCCCAAACAGGTCGCTGAAATGCGGCTGGTGCGCTTCATCCGGGCGAAAGAACCCCGTATTGG  
CAAATATTGACGGCCAGTTAAGCCATTCATGCCAGTAGGCGCGCGGACGAAAGTAAACCCACTGGTGATAACCATTC  
GCGAGCCTCCGGATGACGACCGTAGTGATGAATCTCTCTGCGGGAACAGCAAAATATCACTCGGTCGGCAAACA  
AATTCTCGTCCCTGATTTTTACCACCCCTGACCGCGAATGGTGAGATTGAGAATATAACCTTTCATTCCCAGCGG  
TCGGTCGATAAAAAAATCGAGATAACCGTTGGCCTCAATCGGCGTTAAACCCGCCACCAGATGGGCATTAAACGAG  
TATCCCGGCAGCAGGGGATCATTTTGCCTTCAGCCATACTTTTCATACTCCCGCCATTCAGAGAAGAAACCAATTG  
TCCATATTGCATCAGACATTGCCGTCCTGCGTCTTTACTGGCTCTTCTCGCTAACCAAACCGGTAACCCCGCTTAT  
TAAAGCATTCTGTAACAAAGCGGGACCAAAGCCATGACAAAAACGCGTAACAAAAGTGTCTATAATCACGGCAG  
AAAAGTCCACATTGATTATTTGCACGGCGTCACACTTTGCTATGCCATAGCATTTTTATCCATAAGATTAGCGGATCC  
TACCTGACGCTTTTTATCGCAACTCTCTACTGTTTCTCCATACCCGTTTTTTGGGCTAACAGGAGGAATTAGATCTAT  
GGACGAATTTGAAATGATAAAGAGAAACACATCTGAAATTATCAGCGAGGAAGAGTTAAGAGAGGTTTTAAAAA  
AGATGAAAAATCTGCTTACATAGGTTTTGAACCAAGTGGTAAAATACATTTAGGGCATTATCTCCAAATAAAAAAGA  
TGATTGATTTACAAAATGCTGGATTGATATAATTATATTGTTGGCTGATTACACGCCTATTTAAACCGAGAAAGGAG  
AGTTGGATGAGATTAGAAAAATAGGAGATTATAACAAAAAAGTTTTGAAGCAATGGGGTTAAAGGCAAAATATGT  
TTATGGAAGTGAATTCCAGCTTGATAAGGATTATACACTGAATGTCTATAGATTGGCTTAAAAACTACCTTAAAAAG  
AGCAAGAAGGAGTATGGAAGTTATAGCAAGAGAGGATGAAAATCCAAAGGTTGCTGAAGTTATCTATCCAATAATG  
CAGGTTAATGATATTCATTATTTAGGCGTTGATGTTGCAGTTGGAGGGATGGAGCAGAGAAAAATACACATGTTAGC  
AAGGGAGCTTTTACCAAAAAAGGTTGTTGTATTACAAACCCTGTCTTAACGGGTTTGGATGGAGAAGGAAAGATG  
AGTTCTTCAAAAGGGAATTTATAGCTGTTGATGACTCTCCAGAAGAGATTAGGGCTAAGATAAAGAAAGCATACTG  
CCCAGCTGGAGTTGTTGAAGGAAATCCAATAATGGAGATAGCTAAATACTTCCTTGAATATCCTTTAAACCGGAAGTG  
GTTTGACAGTTAATAGCTATGAGGAGTTAGAGAGTTTATTTAAAAATAAGGAATTGCATCCAATGGATTTAAAAAAT  
GCTGTAGCTGAAGAACTTATAAAGATTTTAGAGCCAATTAGAAAGAGATTATAAGTCGACCATCATCATCATCA  
TTGAGTTTAAACGGTCTCCAGCTTGGCTGTTTTGGCGGATGAGAGAAGATTTTCAGCCTGATACAGATTAAATCAGA  
ACGCAGAAGCGGTCTGATAAAACAGAAATTTGCCTGGCGGCAGTAGCGCGGTGGTCCCACCTGACCCCATGCCGAA  
CTCAGAAGTGAAACGCCGTAGCGCCGATGGTAGTGTGGGTCTCCCCATGCGAGAGTAGGGAAGTCCAGGCATC  
AAATAAACCGAAAGGCTCAGTCGAAAGACTGGGCCTTGTGTTGTAGCTCCCGGTCATCACTGCAGTTTCAAACGCT  
AAATTGCCTGATGCGCTACGCTTATCAGGCCTACATGATCTCTGCAATATATTGAGTTTGCCTGCTTTTGTAGGCCG  
ATAAGGCGTTACGCCGCATCCGGCAAGAAACAGCAAAACAATCCAAAACGCCGCGTTCAGCGCGTTTTTTCTGCT  
TTTCTTCGCGAATTAATTCGCTTCGCAACATGTGAGCACCGGTTTATTGACTACCGGAAGCAGTGTGACCGCAGCT  
CAGGGTCGAATTTGCTTTCGAATTTCTGCCATTCATCCGCTTATTATCACTTATTCAGGCGTAGCACAGGCGTTAA  
GGGCACCAATAACTGCCTTAAAAAAATTACGCCCCGCCCTGCCACTCATCGCAGTACTGTTGTAATTCATTAAGCAT  
TCTGCCGACATGGAAGCCATCACAGACGGCATGATGAACCTGAATCGCCAGCGGCATCAGCACCTGTGCTGCTTGC  
GTATAATATTTGCCCATGGTGAAAAACGGGGGCAAGAAGTTGTCCATATTGGCCACGTTTAAATCAAACCTGGTGAA  
ACTACCCAGGGATTGGCTGAGACGAAAAACATATTCTCAATAAACCCTTTAGGGAAATAGGCCAGGTTTTACCGT  
AACACGCCACATCTTGCGAATATATGTGTAGAAACTGCCGGAATCGTCGTGGTATTCACTCCAGAGCGATGAAAA  
CGTTTCAGTTTGCTCATGGAACCGGTGTAACAAGGGTGAACACTATCCCATATCACCAGCTCACCCTCTTCATTG  
CCATACGGAATTCGGATGAGCATTATCAGGCGGGCAAGAATGTGAATAAAGCCGATAAACTTGTGCTTATTT  
TTCTTIACGGTCTTTAAAAAGGCCGTAATATCCAGCTGAACGGTCTGGTTATAGGTACATTGAGCAACTGACTGAAA  
TGCCTCAAAATGTTCTTTACGATGCCATTGGGATATATCAACGGTGGTATATCCAGTGATTTTTTCTCCATTTAGCT  
TCCTTAGC

**pEvole-MjTyrRS(wt)-Loop3**

TCCTGAAAATCTCGATAACTCAAAAAATACGCCCGGTAGTGATCTTATTTCAATTATGGTGAAAGTTGGAACCTCTTAC  
GTGCCGATCAACGTCTCATTTTCGCCAAAAGTTGGCCAGGGCTTCCCGGTATCAACAGGGACACCAGGATTTATTT  
ATTCTGCGAAGTGATCTTCCGTCACAGGTATTTATTCGGCGCAAAGTGCCTCGGGTGATGCTGCCAACTTACTGATT

TAGTGATGATGGTGTGTTTTGAGGTGCTCCAGTGGCTTCTGTTTCTATCAGCTGTCCCTCCTGTTTCAGTACTGACGG  
GGTGGTGCGTAACGGCAAAAGCACCGCCGGACATCAGCGCTAGCGGAGTGATACTGGCTTACTATGTTGGCACTG  
ATGAGGGTGTCAGTGAAGTGCTTCATGTGGCAGGAGAAAAAGGCTGCACCGGTGCGTCAGCAGAAATATGTGATA  
CAGGATATATTCCGCTTCTCGCTCACTGACTCGCTACGCTCGGTGCTTCGACTGCGGCGAGCGGAAATGGCTTACG  
AACGGGGCGGAGATTTCTGGAAGATGCCAGGAAGATACTTAACAGGGAAGTGAGAGGGCCGCGGCAAAAGCCGTT  
TTTCCATAGGCTCCGCCCCCTGACAAGCATCAGAAATCTGACGCTCAAATCAGTGGTGGCGAAACCCGACAGGA  
CTATAAAGATAACCAGGCGTTTCCCCCTGGCGGCTCCCTCGTGCGCTCTCCTGTTCTGCTTTCGGTTTACCGGTGTC  
ATTCGCTGTTATGGCCGCTTTGTCTCATTCCACGCCTGACACTCAGTTCGGGTAGGCAGTTCGCTCCAAGCTGG  
ACTGTATGCACGAACCCCCCGTTTCAGTCCGACCGCTGCGCCTTATCCGGTAACTATCGTCTTGAGTCCAACCCGGAA  
AGACATGCAAAAGCACCACTGGCAGCAGCCACTGGTAATTGATTAGAGGAGTTAGTCTTGAAGTCATGCGCCGGT  
TAAGGTAAACTGAAAGGACAAGTTTTGGTGACTGCGCTCTCCAAGCCAGTTACCTCGGTTCAAAGAGTTGGTAG  
CTCAGAGAACCTTCGAAAAACCGCCCTGCAAGGCGGTTTTTTCGTTTTTCAGAGCAAGAGATTACGCGCAGACCAAA  
ACGATCTCAAGAAGATCATCTTATTAATCAGATAAAATATTTCTAGATTTTCAGTGCAATTTATCTCTTCAAATGTAGC  
ACCTGAAGTCAGCCCCATACGATATAAGTTGTAATTCTCATGTTTGACAGCTTATCATCGATAAGCTTGGTACCCAAT  
TATGACAACTTGACGGCTACATCATTTCACTTTTTCTTCACAACCGGCACGGAACCTCGCTCGGGCTGGCCCCGGTGCA  
TTTTTAAATACCCGCGAGAAATAGAGTTGATCGTCAAAACCAACATTGCGACCGACGGTGGCGATAGGCATCCGG  
GTGGTGCTCAAAAGCAGCTTCGCTGGCTGATACGTTGGTCTCGCGCCAGCTTAAGACGTAATCCCTAACTGCTG  
GCGGAAAAGATGTGACAGACGCGACGGCGACAAGCAAAACATGCTGTGCGACGCTGGCGATATCAAATTGCTGTC  
TGCCAGGTGATCGCTGATGTACTGACAAGCCTCGCGTACCCGATTATCCATCGGTGGATGGAGCGACTCGTTAATCG  
CTTCCATGCGCCGCAGTAACAATTGCTCAAGCAGATTATCGCCAGCAGCTCCGAATAGCGCCCTTCCCCCTGCCCG  
GCGTTAATGATTTGCCCAAACAGGTCGCTGAAATGCGGCTGGTGCGCTTCATCCGGGCGAAAGAACCCCGTATTGG  
CAAATATTGACGGCCAGTTAAGCCATTCATGCCAGTAGGCGCGCGGACGAAAGTAAACCCACTGGTGATACCATT  
GCGAGCCTCCGGATGACGACCGTAGTGATGAATCTCTCTGGCGGGAACAGCAAAATATCACTCGGTGCGCAAAACA  
AATTCTCGTCCCTGATTTTTACCACCCCCTGACCGCGAATGGTGAGATTGAGAATATAACCTTTCATTCCCAGCGG  
TCGGTGCATAAAAAATCGAGATAACCGTTGGCCTCAATCGGCGTTAAACCCGCCACCAGATGGGCATTAAACGAG  
TATCCCGGCAGCAGGGGATCATTTTGCGCTTCAGCCATACTTTTCATACTCCCGCCATTTCAGAGAAGAAACCAATTG  
TCCATATTGCATCAGACATTGCCGTCACTGCGTCTTTTACTGGCTCTTCTCGCTAACCAAACCGGTAACCCCGCTTAT  
TAAAGCATTCTGTAAACAAAGCGGGACCAAAGCCATGACAAAAACGCGTAACAAAAAGTGTCTATAATCACGGCAG  
AAAAGTCCACATTGATTATTTGCACGGCGTCACACTTTGCTATGCCATAGCATTTTTATCCATAAGATTAGCGGATCC  
TACCTGACGCTTTTTATCGCAACTCTCTACTGTTTCTCCATACCCGTTTTTTTTGGGCTAACAGGAGGAATTAGATCTAT  
GGACGAATTTGAAATGATAAAGAGAAACACATCTGAAATTATCAGCGAGGAAGAGTTAAGAGAGGTTTTAAAAAA  
AGATGAAAAATCTGCTTACATAGGTTTTGAACCAAGTGGTAAAATACATTTAGGGCATTATCTCCAAATAAAAAAGA  
TGATTGATTTACAAAATGCTGGATTGATATAATTATATTGTTGGCTGATTACACGCCTATTTAAACCGAGAAAGGAG  
AGTTGGATGAGATTAGAAAAATAGGAGATTATAACAAAAAAGTTTTTGAAGCAATGGGGTTAAAGGCAAAATATGT  
TTATGGAAGTGAATTCCAGCTTGATAAGGATTATACACTGAATGTCTATAGATTGGCTTTAAAAACTACCTTAAAAAG  
AGCAAGAAGGAGTATGAACTTATAGCAAGAGAGGATGAAAATCCAAAGGTTGCTGAAGTTATCTATCCAATAATG  
CAGGTTAATGATATTCATTATTTAGGCGTTGATGTTGCAGTTGGAGGGATGGAGCAGAGAAAAATACACATGTTAGC  
AAGGGAGCTTTTACCAAAAAAGGTTGTTTGATTACAAACCCTGTCTTAACGGGTTTGGATGGAGAAGGAAAGATG  
AGTTCTTCAAAAGGGAATTTTATAGCTGTTGATGACTCTCCAGAAGAGATTAGGGCTAAGATAAAGAAAGCATACTG  
CCCAGCTGGAGTTGTTGAAGGAAATCCAATAATGGAGATAGCTAAATACTTCCTTGAATATCCTTTAACCGGAGGTA  
GTGGTTTGACAGTTAATAGCTATGAGGAGTTAGAGAGTTTATTTAAAAATAAGGAATTGCATCCAATGGATTTAAAA  
AATGCTGTAGCTGAAGAACTATAAAGATTTTAGAGCCAATTAGAAAAGAGATTATAAGTCGACCATCATCATCA  
TCATTGAGTTTAAACGGTCTCCAGCTTGGCTGTTTTGGCGGATGAGAGAAGATTTTCAGCCTGATACAGATTAAATC  
AGAACGCAGAAGCGGTCTGATAAAACAGAATTTGCCTGGCGGCAGTAGCGCGGTGGTCCCACCTGACCCCATGCC

GAAGTCAGAAAGTGAAACGCCGTAGCGCCGATGGTAGTGTGGGGTCTCCCATGCGAGAGTAGGGAAGTCCAGGC  
ATCAAATAAAACGAAAGGCTCAGTCGAAAGACTGGGCCTTGTTTGTGAGCTCCCGGTCATCACTGCAGTTTCAAAC  
GCTAAATTGCCTGATGCGCTACGCTTATCAGGCCATACATGATCTCTGCAATATATTGAGTTTGCGTGCTTTTGTAGGC  
CGGATAAGGCGTTACGCCGCATCCGGCAAGAAACAGCAAACAATCCAAAACGCCGCGTTCAGCGGCGTTTTTCT  
GCTTTTCTTCGCGAATTAATCCGCTTCGCAACATGTGAGCACCGGTTTATTGACTACCGGAAGCAGTGTGACCGCA  
GCTCAGGGTCGAATTTGCTTTGCAATTTCTGCCATTATCCGCTTATTATCACTTATTCAGGCGTAGCACCAGGCGTT  
TAAGGGCACCAATAACTGCCTTAAAAAATTACGCCCCGCCCTGCCACTCATCGCAGTACTGTTGTAATTCATTAAG  
CATTCTGCCGACATGGAAGCCATCACAGACGGCATGATGAACCTGAATCGCCAGCGGCATCAGCACCTTGTCGCCT  
TGCGTATAATATTTGCCCATGGTGAAAACGGGGGCGAAGAAGTTGTCCATATTGGCCACGTTTAAATCAAAACTGGT  
GAAACTCACCCAGGGATTGGCTGAGACGAAAAACATATTCTCAATAAACCCTTAGGGAAATAGGCCAGGTTTTCA  
CCGTAACACGCCACATCTTGCAATATATGTGTAGAACTGCCGGAATCGTCGTGGTATTCACTCCAGAGCGATGA  
AAACGTTTCAGTTTGCTCATGGAACGGTGTAACAAGGGTGAACACTATCCCATATCACCAGCTCACCCTCTTTCA  
TTGCCATACGGAATTCGGATGAGCATTATCAGGCGGGCAAGAATGTGAATAAAGCCGGATAAAACTTGTGCTT  
ATTTTTCTTTACGGTCTTTAAAAAGGCCGTAATATCCAGCTGAACGGTCTGGTTATAGGTACATTGAGCAACTGACTG  
AAATGCCTCAAAATGTTCTTTACGATGCCATTGGGATATATCAACGGTGGTATATCCAGTGATTTTTTCTCCATTTA  
GCTTCCTTAGC

**pEvole-MVTyrRS**

TCCTGAAAATCTCGATAACTCAAAAAATACGCCCGGTAGTGATCTTATTTTATTATGGTGAAAGTTGGAACCTTTAC  
GTGCCGATCAACGTCTCATTTTCGCCAAAAGTTGGCCAGGGCTTCCCGGTATCAACAGGGACACCAGGATTTATTT  
ATTCTGCGAAGTGATCTTCCGTCACAGTATTTATTCCGGCGCAAAGTGCGTCGGGTGATGCTGCCAACTTACTGATT  
TAGTGATGATGGTGTTTTGAGGTGCTCCAGTGGCTTCTGTTTCTATCAGCTGTCCCTCCTGTTACGCTACTGACGG  
GGTGGTGCGTAACGGCAAAAGCACCGCCGGACATCAGCGCTAGCGGAGTGATACTGGCTTACTATGTTGGCACTG  
ATGAGGGTGTCAGTGAAGTGCTTCATGTGGCAGGAGAAAAAAGGCTGCACCGGTGCGTCAGCAGAATATGTGATA  
CAGGATATATTCCGCTTCTCGCTCACTGACTCGCTACGCTCGGTCTGTCGACTGCGGCGAGCGGAAATGGCTTACG  
AACGGGGCGGAGATTTCTGGAAGATGCCAGGAAGATACTTAACAGGAAGTGAGAGGGCCGCGGCAAAAGCCGTT  
TTTCCATAGGCTCCGCCCCCTGACAAGCATCACGAAATCTGACGCTCAAATCAGTGGTGGCGAAACCCGACAGGA  
CTATAAAGATACCAGGCGTTTCCCTTGCGGGCTCCCTCGTGCGCTCTCCTGTTCTGCTTTTCGGTTTACCGGTGTC  
ATTCGCTGTTATGGCCGCTTTGTCTCATTCACGCTGACACTCAGTTCGGGTAGGCAGTTCGCTCCAAGCTGG  
ACTGTATGCACGAACCCCCGTTCACTCCGACCGCTGCGCCTTATCCGGTAACTATCGTCTTGAGTCCAACCCGAA  
AGACATGCAAAAGCACCACTGGCAGCAGCCACTGGTAATTGATTAGAGGAGTAGTCTTGAAAGTCATGCGCCGGT  
TAAGGTAAACTGAAAGGACAAGTTTTGGTGACTGCGCTCTCCAAGCCAGTTACCTCGGTTCAAAGAGTTGGTAG  
CTCAGAGAACCTTCGAAAAACCGCCCTGCAAGGCGGTTTTTTCGTTTTTCAGAGCAAGAGATTACGCGCAGACAAA  
ACGATCTCAAGAAGATCATCTTATTAATCAGATAAAATATTTCTAGATTTCACTGCAATTTATCTCTTCAAATGTAGC  
ACCTGAAGTCAGCCCCATACGATATAAGTTGTAATTCTCATGTTTGACAGCTTATCATCGATAAGCTTGGTACCCAAT  
TATGACAACTTGACGGCTACATCATTCACTTTTCTTCAACCCGGCACGGAACCTCGCTCGGGCTGGCCCCGGTGCA  
TTTTTTAAATACCCGCGAGAAATAGAGTTGATCGTCAAAACCAACATTGCGACCGACGGTGGCGATAGGCATCCGG  
GTGGTGCTCAAAAGCAGCTTCGCTGGCTGATACGTTGGTCTCGCGCCAGCTTAAGACGTAATCCCTAACTGCTG  
GCGGAAAAGATGTGACAGACGCGACGGCGACAAGCAAACATGCTGTGCGACGCTGGCGATATCAAAATTGCTGTC  
TGCCAGGTGATCGCTGATGTACTGACAAGCCTCGGTACCCGATTATCCATCGGTGGATGGAGCGACTCGTTAATCG  
CTTCCATGCGCCGAGTAACAATTGCTCAAGCAGATTATCGCCAGCAGCTCCGAATAGCGCCCTTCCCTTGCCCCG  
GCGTTAATGATTTGCCCAAACAGGTCGCTGAAATGCGGCTGGTGCGCTTCATCCGGGCGAAAGAACCCCGTATTGG  
CAAATATTGACGGCCAGTTAAGCCATTATGCCAGTAGGCGCGCGACGAAAGTAAACCCACTGGTGATAACCATTC  
GCGAGCTCCGGATGACGACCGTAGTGATGAATCTCTCTGGCGGGAACAGCAAAATATCACTCGGTCGGCAAACA  
AATTCTCGTCCCTGATTTTTACCACCCCTGACCGCAATGGTGAGATTGAGAATATAACCTTTCATTCCAGCGG

TCGGTCGATAAAAAAATCGAGATAACCGTTGGCCTCAATCGGCGTTAAACCCGCCACCAGATGGGCATTAAACGAG  
TATCCCGGCAGCAGGGGATCATTTTGCGCTTCAGCCATACTTTTCATACTCCCGCCATTAGAGAGAAGAAACCAATTG  
TCCATATTGCATCAGACATTGCCGTCACTGCGTCTTTTACTGGCTCTTCTCGCTAACCAAACCGGTAACCCCGCTTAT  
TAAAGCATTCTGTAACAAAGCGGGACCAAAGCCATGACAAAAACGCGTAACAAAAGTGTCTATAATCACGGCAG  
AAAAGTCCACATTGATTATTTGCACGGCGTCACACTTTGCTATGCCATAGCATTTTTATCCATAAGATTAGCGGATCC  
TACCTGACGCTTTTTATCGCAACTCTCTACTGTTTCTCCATACCCGTTTTTTTGGGCTAACAGGAGGAATTAGATCTAT  
GGAAAATACCGATCATAACCAATAATGAACATCGTCTGACCCAGCTTCTTAGCATAGCGGAAGAATGCGAAACCCGTG  
GATCGTTTAAACAGCTGGTGGATTGCGGTCTGATCTTTACTGCGTATAATGGCTTTGAACCGAGCGGCCGTATTTCAT  
ATTGCCCAGGCGTTGATAACAGTCATGAACACCAACAACATAATTGAATGCGGTGGCCAGATGATTATCTACATCGC  
GGACTGGTTTGCGAAAATGAACCTGAAGATGAATGGCGATATTAACAAGATTCGTGAACCTGGGCCGTATTTTCATA  
GAAGTGTTTAAAGCATGTGGCATAAATCTGGACGGGACCCGTTTCATTTGGGCGAGCGAGTTTATAGCGAGCAATC  
CGAGCTACATTGAACGTATGCTGGATATTGCAGAATTTAGCACCATTAGTCGTGTGAAACGTTGCTGCCAGATTATG  
GGCCGGAATGAAAGTGACTGCCTGAAAAGCGAGCCAAATCTTTTATCCGTGTATGCAAGCGGCGGACGTTTTTGAGT  
TAGTACCGGAAGGAATTGATATTTGCCAACTGGGTATTGACCAGCGTAAAGTGAATATGTTGGCGATTGAGTATGCG  
AATGACCGTGGTCTGAAAATTCTATTAGTTTGTCCTATCACATGCTGATGAGCCTGAGCGGTCCGAAGAAAAAGA  
TGTCAAAAAGCGATCCGCAGGGCGCATCTTTATGGATGATACCGAACAGGAAGTGAGCGAAAAAGATAAGCCGTG  
CGTATTGCACCGATGAAACCTTTGATAATCCGATTTTTGAATATATCAAGTATCTGCTGCTGCGTGGTTCGGAACCC  
TGAATCTGTGCGGCAAAATCTACACCGATATAGAAAGCATTAGGAAGATTTTAGCAGCATGAATAAACGTGAGCT  
GAAGACCGACGTGGCGAACTACATAAACACAATTATCGATCTGGTGCGTGAACATTTCAAGAAACCGGAACTGAGC  
GAGCTGCTGTGCAACGTTAAAAGCTATCAGCAGCCGAGCAAATAAGTCGACCATCATCATCATCATATTGAGTTTAA  
AACGGTCTCCAGCTTGGCTGTTTTGGCGGATGAGAGAAGATTTTCAGCCTGATACAGATTAAATCAGAACGCAGAA  
GCGGTCTGATAAAACAGAAATTTGCCTGGCGGCAGTAGCGCGGTGGTCCACCTGACCCCATGCCGAACTCAGAAGT  
GAAACGCCGTAGCGCCGATGGTAGTGTGGGGTCTCCCCATGCGAGAGTAGGGAACTGCCAGGCATCAAATAAAAC  
GAAAGGCTCAGTCGAAAGACTGGGCCTTGTGTTGTGAGCTCCCGGTATCACTGCAGTTTCAAACGCTAAATTGCCT  
GATGCGCTACGCTTATCAGGCCTACATGATCTCTGCAATATATTGAGTTTTCGTGCTTTTGTAGGCCGGATAAGGCGT  
TCACGCCGCATCCGGCAAGAAACAGCAAACAATCCAAAACGCCGCTTCAGCGGCGTTTTTCTGCTTTTCTTCGC  
GAATTAATTCCGCTTCGCAACATGTGAGCACCGGTTTATTGACTACCGGAAGCAGTGTGACCGCAGCTCAGGGTCG  
AATTGCTTTTCGAATTTCTGCCATTATCCGCTTATTATCACTTATTAGGCGTAGCACCAGGCGTTTAAAGGGACCA  
ATAACTGCCTTAAAAAAATTACGCCCCGCCCTGCCACTCATCGCAGTACTGTTGTAATTCATTAAGCATTCTGCCGAC  
ATGGAAGCCATCACAGACGGCATGATGAACCTGAATCGCCAGCGGCATCAGCACCTTGTGCGCTTGGCTATAATATT  
TGCCCATGGTGAAAACGGGGCGAAGAAGTTGTCCATATTGGCCACGTTTAAATCAAACCTGGTGAACTCACCCA  
GGGATTGGCTGAGACGAAAAACATATTCTCAATAAACCCCTTAGGGAAATAGGCCAGGTTTTACCGTAACACGCC  
ACATCTTGCGAATATATGTGTAGAAACTGCCGGAAATCGTCGTGGTATTCACTCCAGAGCGATGAAAACGTTTCAGT  
TTGCTCATGGAACCGGTGAACAAGGGTGAACACTATCCCATATCACCAGCTCACCCTCTTCATTGCCATACGGA  
ATTCCGGATGAGCATTCATCAGGCGGGCAAGAATGTGAATAAAGGCCGGATAAAACTTGTGCTTATTTTTCTTTACG  
GTCTTTAAAAAGGCCGTAATATCCAGCTGAACGGTCTGGTTATAGGTACATTGAGCAACTGACTGAAATGCCTCAAA  
ATGTTCTTTACGATGCCATTGGGATATATCAACGGTGGTATATCCAGTGATTTTTTCTCCATTTTAGCTTCCTTAGC

**pBAD-eGFP150TAG-MjtRNA**

AAGAAACCAATTGTCCATATTGCATCAGACATTGCCGTCACTGCGTCTTTTACTGGCTCTTCTCGCTAACCAAACCG  
GTAACCCCGCTTATTAAGCATTCTGTAACAAAGCGGGACCAAAGCCATGACAAAAACGCGTAACAAAAGTGTCT  
ATAATCACGGCAGAAAAGTCCACATTGATTATTTGCACGGCGTCACACTTTGCTATGCCATAGCATTTTTATCCATAA  
GATTAGCGGATCCTACCTGACGCTTTTTATCGCAACTCTCTACTGTTTCTCCATACCCGTTTTTTGGGCTAACAGGAG  
GAATTAACCATGGTGAGCAAAGGCGAAGAAGTTCACCGGTGTGGTGCCGATTCTGGTTGAACCTGGACGGCGAT  
GTGAACGGCCACAAATTCAGCGTGAGTGGCGAAGGTGAAGGCGATGCGACCTACGGCAAACCTGACGCTGAAGTTC



ATCTGCACCACGGGCAAAC TGCCGGTTCATGGCCGACGCTGGTGACCACGCTGACCTATGGCGTGCAATGCTTCA  
GTCGCTACCCGGACCACATGAAGCAGCAGCACTTCTTCAAAAGCGCGATGCCAGAAGGCTACGTGCAAGAACGCA  
CCATCTTCTTCAAGGACGACGGCAACTACAAAACCCGCGCCGAGGTGAAATTCGAGGGTGATACGCTGGTGAACC  
GCATCGAGCTCAAGGGCATCGACTTCAAAGAAGACGGCAACATTCTGGGCCACAAGCTGGAGTATAACTACAACA  
GCCACTAGGTGTACATCATGGCGGACAAGCAGAAAAACGGCATCAAAGTTAACTTCAAGATCCGCCACAACATCGA  
GGATGGCAGCGTGACGCTGGCCGATCATTACCAGCAGAATACGCCGATTGGCGACGGTCCGGTTCTGCTGCCAGAT  
AACCCTATCTGAGCAGCAGAGCGCGCTGAGCAAAGATCCGAACGAGAAGCGCGATCACATGGTTCTGCTGGAA  
TTCGTGACCGCCGCGGGCATCACCTCGGTATGGATGAACTGTACAAACATCATCATCATCATTAAAAAGCTTGG  
CTGTTTTGGCGGATGAGAGAAGATTTTCAGCCTGATACAGATTAAATCAGAACGCAGAAGCGGTCTGATAAAACAG  
AATTGCTTGGCGGCAGTAGCGCGGTGGTCCCACCTGACCCCATGCCAACTCAGAAGTGAAACGCCGTAGCGCCG  
ATGGTAGTGTGGGTCTCCCATGCGAGAGTAGGAACTGCCAGGCATCAAATAAAACGAAAGGCTCAGTCGAAA  
GACTGGGCCTTTCGTTTTATCTGTTGTTGTCGGTGAACGCTCTCCTGAGTAGGACAAATCCGCCGGGAGCGGATTT  
GAACGTTGCGAAGCAACGGCCCGGAGGGTGGCGGGCAGGACGCCCGCCATAAACTGCCAGGCATCACTGCAGCTG  
CTTTCTTCGCGAATTAATTCGCTTCGCAACATGTGAGCACCGGTTTATTGACTACCGGAAGCAGTGTGACCGTGT  
GCTTCTCAAATGCCTGAGGCCAGTTTGCTCAGGCTCTCCCCGTGGAGGTAATAATTGACGATATGATCAGTGCACGG  
CTAACTAAGCGGCCTGCTGACTTTCTCGCCGATCAAAAGGCATTTTGCTATTAAGGGATTGACGAGGGCGTATCTGC  
GCAGTAAGATGCGCCCCGATTCCGGCGGTAGTTCAGCAGGGCAGAACGGCGGACTCTAAATCCGCATGGCAGGG  
GTTCAAATCCCTCCGCCGACCAAATTCGAAAAGCCTGCTCAACGAGCAGGCTTTTTTGATGCTCGAGAAGCAG  
AAGGCCATCCTGACGGATGGCCTTTTTGCGTTTCTACAAACTCTTTGTTATTTTTCTAAATACATTCAAATATGTAT  
CCGCTCATGAGACAATAACCTGATAAATGCTTCAATAATATTGAAAAAGGAAGAGTATGAGTATTCAACATTTCCG  
TGTCGCCCTTATTCCTTTTTTGCGGCATTTGCTTCCTGTTTTGCTCAGCCAGAAACGCTGGTGAAAGTAAAAGA  
TGCTGAAGATCAGTTGGGTGCACGAGTGGGTACATCGAACTGGATCTCAACAGCGGTAAGATCCTTGAGAGTTTT  
CGCCCCGAAGAACGTTTTCCAATGATGAGCACTTTTAAAGTTCTGCTATGTGGCGCGGTATTATCCCGTGTGACGC  
CGGGCAAGAGCAACTCGGTGCGCCGATACACTATTCTCAGAATGACTTGGTTGAGTACTACCAGTCACAGAAAAG  
CATCTTACGGATGGCATGACAGTAAGAGAATTATGCAGTGCTGCCATAACCATGAGTGATAAACTGCGGCCAACTT  
ACTTCTGACAACGATCGGAGGACCGAAGGAGCTAACCGCTTTTTTGACAACATGGGGGATCATGTAACCTCGCCTT  
GATCGTTGGGAACCGGAGCTGAATGAAGCCATACCAAACGACGAGCGTGACACCACGATGCCTGTAGCAATGGCA  
ACAACGTTGCGCAAACTATTAAGTGGCGAACTACTTACTCTAGCTTCCCGGCAACAATTAAGACTGGATGGAGGC  
GGATAAAGTGCAGGACCACTTCTGCGCTCGGCCCTCCGGCTGGCTGGTTATTGCTGATAAATCTGGAGCCGGTG  
AGCGTGGGTCTCGCGGTATCATTGCAGCACTGGGGCCAGATGGTAAGCCCTCCCGTATCGTAGTTATCTACACGACG  
GGGAGTCAGGCAACTATGGATGAACGAAATAGACAGATCGCTGAGATAGGTGCCTCACTGATTAAGCATTGGTAAC  
TGTCAGACCAAGTTTACTCATATATACTTTAGATTGATTTAAACTTCATTTTAAATTTAAAGGATCTAGGTGAAGAT  
CCTTTTGATAATCTCATGACCAAAATCCCTTAACGTGAGTTTTCGTTCCACTGAGCGTCAGACCCCGTAGAAAAAG  
TCAAAGGATCTTCTTGAGATCCTTTTTTCTGCGCGTAATCTGCTGCTTGCAAACAAAAAAACCACCGCTACCAGCG  
GTGGTTTGTTGCCGGATCAAGAGCTACCAACTCTTTTTCCGAAGGTAACCTGGCTTCAGCAGAGCGCAGATACCAA  
ATACTGTCCTTCTAGTGTAGCCGTAGTTAGGCCACCACTTCAAGAACTCTGTAGCACCGCTACATACCTCGCTCTGC  
TAATCCTGTTACCACTGGCTGCTGCCAGTGGCGATAAGTCGTGTCTTACCGGGTTGGACTCAAGACGATAGTTACCG  
GATAAGGCGCAGCGGTGGGCTGAACGGGGGGTTCGTGCACACAGCCAGCTTGGAGCGAACGACCTACACCGAA  
CTGAGATACCTACAGCGTGAGCTATGAGAAAAGCGCCACGCTTCCCGAAGGGAGAAAGGCGGACAGGTATCCGGTA  
AGCGGCAGGGTCGGAACAGGAGAGCGCACGAGGGAGCTTCCAGGGGAAACGCCTGGTATCTTTATAGTCCTGTC  
GGGTTTCGCCACCTCTGACTTGAGCGTCGATTTTTGTGATGCTCGTCAGGGGGGCGGAGCCTATGAAAAACGCCA  
GCAACGCGGCCTTTTTACGGTTCCTGGCCTTTTGCTGGCCTTTGCTCACATGTTCTTCTGCGTTATCCCTGATT  
TGTGGATAACCGTATTACCGCCTTTGAGTGAGCTGATACCGCTCGCCGAGCCGAACGACCGAGCGCAGCGAGTCA  
GTGAGCGAGGAAGCGGAAGAGCGCCTGATGCGGTATTTCTCCTTACGCATCTGTGCGGTATTTACACCGCATATG

GTGCACTCTCAGTACAATCTGCTCTGATGCCGCATAGTTAAGCCAGTATACACTCCGCTATCGCTACGTGACTGGGTC  
ATGGCTGCGCCCCGACACCCGCCAACACCCGCTGACGCGCCCTGACGGGCTTGTCTGCTCCCGGCATCCGCTTACA  
GACAAGCTGTGACCGTCTCCGGGAGCTGCATGTGTTCAGAGGTTTTACCGTTCATCACCGAAACGCGCGAGGCAGC  
AGATCAATTGCGCGCGGAAGGCGAAGCGGCATGCATAATGTGCCTGTCAAATGGACGAAGCAGGGATTCTGCAAA  
CCCTATGCTACTCCGTCAAGCCGTCAATTGTCTGATTCTGTTACCAATTATGACAACCTGACGGCTACATCATTCACTT  
TTTCTTACAACCGGCACGGAACCTCGCTCGGGCTGGCCCCGGTGCAATTTTTTAAATACCCGCGAGAAATAGAGTTGA  
TCGTCAAAAACCAACATTGCGACCGACGGTGGCGATAGGCATCCGGGTGGTGCTCAAAAAGCAGCTTCGCCTGGCTGA  
TACGTGGTCTCGCGCCAGCTTAAGACGCTAATCCCTAACTGTGGCGGAAAAGATGTGACAGACGCGACGGCGA  
CAAGCAAACATGCTGTGCGACGCTGGCGATATCAAAATTGCTGTCTGCCAGGTGATCGCTGATGTACTGACAAGCC  
TCGCGTACCCGATTATCCATCGGTGGATGGAGCGACTCGTTAATCGCTTCCATGCGCCGCAGTAACAATTGCTCAAG  
CAGATTATCGCCAGCAGCTCCGAATAGCGCCCTTCCCTTGCCCGGCGTTAATGATTTGCCCAACAGGTCGCTGA  
AATGCGGCTGGTGCGTTCATCCGGGCGAAAGAACCCCGTATTGGCAAATATTGACGGCCAGTTAAGCCATTCATG  
CCAGTAGGCGCGCGACGAAAAGTAAACCCACTGGTGATACCATTGCGGAGCCTCCGGATGACGACCGTAGTGATGA  
ATCTCTCTGGCGGGAACAGCAAAATATCACCCGGTCGGCAAAACAAATTCTCGTCCCTGATTTTTTACCACCCCTG  
ACCGCGAATGGTGAGATTGAGAAATATAACCTTTTCATTCCAGCGGTGGTCGATAAAAAATCGAGATAACCGTTG  
GCCTCAATCGGCGTTAAACCCGCCACCAGATGGGCATTAAACGAGTATCCCGGCAGCAGGGGATCATTTTGCGCTT  
CAGCCATACTTTTCATACTCCCGCCATTCAGAG

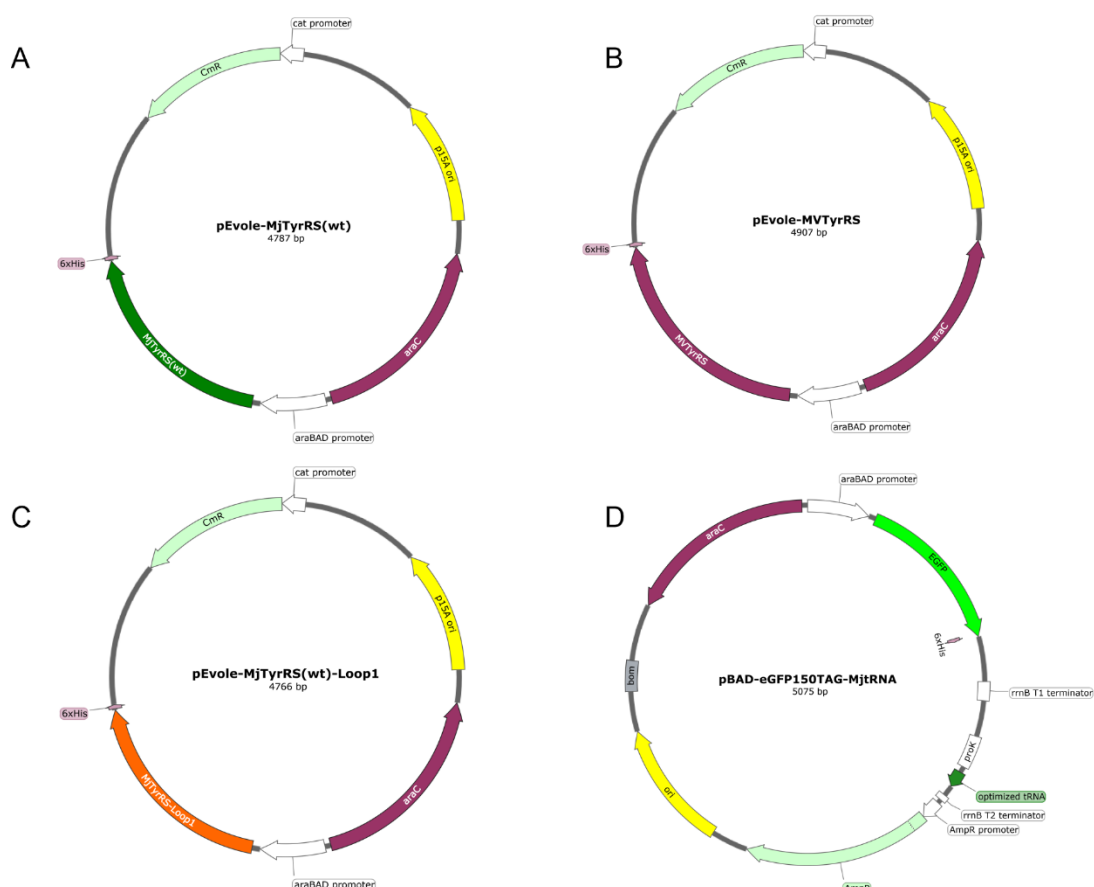

**Figure S1.** The maps of some plasmids used in this work.(A) pEvole-MjTyrRS(wt) (B) pEvole-MVTyrRS (C) pEvole-MjTyrRS(wt)-Loop1 (D) pBAD-eGFP150TAG-MjtRNA.

*Methanococcus*

**Methanococcus** .....  
**Megavirus** ...MNQFKELLTNVENISLIYNDSDNRVMFTMKSHLLYFLTRFKNSDIVKIEKDNLK YF  
**Cafeteria** ...MNQFKELLTNVENISLIYNDSDNRVMFTMKSHLLYFLTRFKNSDIVKIEKDNLK YF  
**Megavirus** ...MNQFKELLTNVENISLIYNDSDNHVMFTMKSHLSYFLTRFKNSDVVKIEKDNLK YF  
**Megavirus** ...MNQFKELLTNVENISLIYNDSDNHVMFTMKSHLSYFLTRFKNSDVVKIEKDNLK YF  
**Mimivirus** ...MNQFKELLTNVKNISLIYNDNDHHVMFTMKSHLSYFLTRFKNSDVVKIEKDNLE YF  
**Moumouvirus** .....  
**Megavirus** .....  
**Saudi** .....  
**Cotonvirus** MDNFTTRFCAELSQNRDINVINISENEIIFEFVDKSLYFTNKFEEEDRIIDITFIDNQKYL C  
**Acanthamoeba** .....  
**Acanthamoeba** .....  
**Mimivirus** .....  
**Niemeyer** .....  
**Samba** .....  
**Mimivirus** .....  
**Hirudovirus** .....  
**Acanthamoeba** .....  
**Acanthamoeba** .....  
**Niemeyer** .....  
**Catovirus** .....  
**Terrestriovirus** .....  
**Harvfovirus** .....  
**Orpheovirus** .....  
**Pandoravirus** .....MDDARDQILQDDKNRAFGAS  
**Pandoravirus** .....MMDDTDHQHREK  
**Pandoravirus** .....  
**Pandoravirus** .....  
**Mimivirus** .....  
**Tupanvirus** .....  
**Tupanvirus** .....  
**Marseillevirus** .....  
**Marseillevirus** .....  
**Edafosvirus** .....  
**Hokovirus** .....  
**Homavirus** .....  
**Klosneuvirus** .....  
**Fadolivirus** .....  
**Megavirus** ...MNQFKELLTNVENISLIYNDSDNHVMFTMKSHLSYFLTRFKNSDVVKIEKDNLK YF  
**Megavirus** ...MNQFKELLTNVENISLIYNDSDNHVMFTMKSHLSYFLTRFKNSDVVKIEKDNLK YF  
**Acanthamoeba** .....

*Methanococcus*

1 10 20  
α1 α2  
β1  
.....  
**Methanococcus** .....MDEFEMIKRNT..SEIISEEE..LREVL  
**Megavirus** MLDEISSDNYLDIYDKFIKEYQIYDLDDYDNFI DQRVQNLLSIS..EECDTIDR..LKELV  
**Cafeteria** MLDEISSDNYLDIYDKFIKEYQIYDLDDYDNFI DQRVQNLLSIS..EECDTIDR..LKELV  
**Megavirus** MLDEIASDNYLDVYDKFMKEYQIYDLDDYDNFI DQRVQNLLSIS..EECDTIDR..LKELV  
**Megavirus** MLDEIASDNYLDVYDKFIKEYHIYDLDDYDNFI DQRVQNLLSIS..EECDTIDR..LKELV  
**Mimivirus** IFDEITS DNYLDIYDKFIKQYQIYDLDDYDNFI DQRVQNLLSIS..EECDTIDR..LKELV  
**Moumouvirus** .....MEQQTLSV EEFKFTRLSIS..EECETPDR..LVELI  
**Megavirus** .....MEQQILST EEKITRLLISIC..EECETPDR..LEELI  
**Saudi** .....MEQQTLSV EEFKFTRLSIS..EECETPDR..LEELI  
**Cotonvirus** VTREDVDSNFI PDSTYVIKCHDSYVETFDVVKRVDQLVAIS..EECDTIDR..LRDLI  
**Acanthamoeba** .....MENTDHTNNEHRLTQLLSIA..EECETLDR..LKQLV  
**Acanthamoeba** .....MENTDHTNNEHRLTQLLSIA..EECETLDR..LKQLV  
**Mimivirus** .....MENTDHTNNEHRLTQLLSIA..EECETLDR..LKQLV  
**Niemeyer** .....MENTDHTNNEHRLTQLLSIA..EECETLDR..LKQLV  
**Samba** .....MENTDHTNNEHRLTQLLSIA..EECETLDR..LKQLV  
**Mimivirus** .....MENTDYTNNEHRLNQLLSIA..EECETLDR..LKQLV  
**Hirudovirus** .....MENTDYTNNEHRLNQLLSIA..EECETLDR..LKQLV  
**Acanthamoeba** .....MENTDYTNNEHRLNQLLSIA..EECETLDR..LKQLV  
**Acanthamoeba** .....MENTDYTNNEHRLNQLLSIA..EECETLDR..LKQLV  
**Niemeyer** .....MENTDYTNNEHRLNQLLSIA..EECETLDR..LKQLV  
**Catovirus** .....MNIQENIKTIKSIG..EEIIGGDS..LERLL  
**Terrestriovirus** .....MNPQEYDLISHRISP DDIVGKSYLMEKLQ  
**Harvfovirus** .....MQSRYSITAGV..KEVINAKY..LKALL  
**Orpheovirus** .....MNTYNLITRNL..QEVVGNDEL LKKID  
**Pandoravirus** SHTSSSTSTSIQQPAGIIGLPRSRDNIADDDV EYRYGLMTRDL..EEVIGDFAE IKAIM  
**Pandoravirus** TEKSVHSQGGNGSPTPIGV DSTARQTDGDDV EYRYGLVVRDL..DEVIGDFAE IKAIM  
**Pandoravirus** .....MIDDDDDGGKETAHLP TDDGALDQDDV EYRYALVVRDL..DEVIGDFAE IKAIM  
**Pandoravirus** ..MISDDGDDNSGGKEAAHLPVGNIDPDQGDV EYRYALVVRDL..DEVIGDFAE IKAIM  
**Mimivirus** .....MTELTTFDFITRNL..EPLVGNDAVR LLEII  
**Tupanvirus** .....MEVVQDKISLITRNL..QEVIGIDE..LQNI  
**Tupanvirus** .....MEIPDDKLSLITRNL..QEIIGLDE..LQKII  
**Marseillevirus** .....MSNYDLIVKDL..HEIVGED I..LKKIA  
**Marseillevirus** .....MSNFDLIVKGL..HEIVGKDL..LEKIA  
**Edafosvirus** .....MSDEKYNITRNL..QEIIGSDD..LKELL  
**Hokovirus** .....MNKLTIDEKRELITKNL..QEILGKQE..LDNLL  
**Homavirus** .....MTNLSVDEKYNLITRNL..QEVLSGEAD IKSIL  
**Klosneuvirus** .....MELSVDEKFNLITRNL..QETILDEVI MKKII  
**Fadolivirus** .....MELTVDEKYNLITRNL..QEKIVDEEI MKKIL  
**Megavirus** MLDEISSN NYLDIYDKFMKEYQIYDLDDYDNFI DQRVQNLLSIS..EECDTIDR..LKELV  
**Megavirus** MLDEISSDNYLDIYDKFIKEYQIYDLDDYDNFI DQRVQNLLSIS..EECDTIDR..LKELV  
**Acanthamoeba** .....MEQQTLSV EEFKFTRLSIS..EECETPDR..LEELI

|                 |             | β2   |          | α3      |         | β3       |      | α4            |             |
|-----------------|-------------|------|----------|---------|---------|----------|------|---------------|-------------|
|                 | .. 2        | 30   | 40       | 50      | 60      | 70       | 80   |               |             |
| Methanococcus   | .. KKDEKSA  | YIC  | FEPSGRIH | IGH.YLQ | TKKMIDL | QAGFD    | IIL  | LADLHAYL      | .. NQKGE    |
| Megavirus       | .ESFKNFTA   | YNG  | FEPSGRIH | AQALIT  | VMNTNTI | IQNGGSM  | IYY  | LADWFA        | QMNHKMGDDL  |
| Cafeteria       | .ESFKNFTA   | YNG  | FEPSGRIH | AQALIT  | VMNTNTI | IQNGGSM  | IYY  | LADWFA        | QMNHKMGDDL  |
| Megavirus       | .ESFKNFTA   | YNG  | FEPSGRIH | AQALIT  | VMNTNTI | IQNGGSM  | IYY  | LADWFA        | QMNHKMGDDL  |
| Megavirus       | .ESFKNFTA   | YNG  | FEPSGRIH | AQALIT  | VMNTNTI | IQNGGSM  | IYY  | LADWFA        | QMNHKMGDDL  |
| Mimivirus       | .ESFKNFTA   | YNG  | FEPSGRIH | AQALIT  | VMNTNTI | IKNGGSM  | IYY  | LADWFA        | QMNHKMGDDL  |
| Moumouvirus     | .NTGKKFTA   | YNG  | FEPSGRIH | AQALIT  | VMNTNEI | ISCGGTMI | IYY  | LADLFA        | KMNKKMDSDL  |
| Megavirus       | .KSGKKFTA   | YNG  | FEPSGRIH | AQALIT  | VMNTNEI | ISCGGRMI | IYY  | LADLFA        | KMNKKMDSDL  |
| Saudi           | .KSGKKFTA   | YNG  | FEPSGRIH | AQALIT  | VMNTNEI | ISCGGRMI | IYY  | LADLFA        | KMNKKMDSDL  |
| Cotonvirus      | .ISGKKFVAY  | YNG  | FEPSGRIH | AQAVIT  | VLNTNTI | IENGGRMI | IYY  | LADWFA        | QNLNHLGGDDL |
| Acanthamoeba    | .DSGRIFTAY  | YNG  | FEPSGRIH | AQALIT  | VMNTNNI | IECGGQMI | IYY  | LADWFA        | KMNLMKMGDI  |
| Acanthamoeba    | .DSGRIFTAY  | YNG  | FEPSGRIH | AQALIT  | VMNTNNI | IECGGQMI | IYY  | LADWFA        | KMNLMKMGDI  |
| Mimivirus       | .DSGRIFTAY  | YNG  | FEPSGRIH | AQALIT  | VMNTNNI | IECGGQMI | IYY  | LADWFA        | KMNLMKMGDI  |
| Niemeyer        | .DSGRIFTAY  | YNG  | FEPSGRIH | AQALIT  | VMNTNNI | IECGGQMI | IYY  | LADWFA        | KMNLMKMGDI  |
| Samba           | .DSGRIFTAY  | YNG  | FEPSGRIH | AQALIT  | VMNTNNI | IECGGQMI | IYY  | LADWFA        | KMNLMKMGDI  |
| Mimivirus       | .DSGRIFTAY  | YNG  | FEPSGRIH | AQALIT  | VMNTNNI | IECGGQMI | IYY  | LADWFA        | KMNLMKMGDI  |
| Hirudovirus     | .DSGRIFTAY  | YNG  | FEPSGRIH | AQALIT  | VMNTNNI | IECGGQMI | IYY  | LADWFA        | KMNLMKMGDI  |
| Acanthamoeba    | .DSGRIFTAY  | YNG  | FEPSGRIH | AQALIT  | VMNTNNI | IECGGQMI | IYY  | LADWFA        | KMNLMKMGDI  |
| Acanthamoeba    | .DSGRIFTAY  | YNG  | FEPSGRIH | AQALIT  | VMNTNNI | IECGGQMI | IYY  | LADWFA        | KMNLMKMGDI  |
| Niemeyer        | .DSGRIFTAY  | YNG  | FEPSGRIH | AQALIT  | VMNTNNI | IECGGQMI | IYY  | LADWFA        | KMNLMKMGDI  |
| Catovirus       | .THQRVYAY   | YDGF | EPSSGRMH | AQGLLR  | THNVNKF | ISGVHFKF | WVAD | WFAKMNLMKMGDI |             |
| Terrestriovirus | .. AGKQLKGY | VVCF | APTGRCH  | IGY.AS  | LLLVKAQ | CDLAGE   | IIIL | LADVHAFLD     | ARKSGL      |
| Harvovirus      | EDASYSPKGY  | WGT  | APTGRCH  | IGY.LR  | AMFVIAD | LVNANCE  | VIIL | LADIHAFLD     | SRKSPQ      |
| Orpheovirus     | .. NGEDIKVV | WGT  | APTGRCH  | IGY.FV  | PLKIAAD | LLNAGCK  | VTIL | LADLHAYLD     | NLKTDW      |
| Pandoravirus    | .. AERPLVIV | WGT  | APTGRCH  | IGY.FV  | PLKIAAD | FLQAGCR  | VKIL | LADVHAFLD     | NGKTPW      |
| Pandoravirus    | .. AERPLVIV | WGT  | APTGRCH  | IGY.FV  | PLKIAAD | FLQAGCR  | VKIL | LADVHAFLD     | NGKTPW      |
| Pandoravirus    | .. AERPLVIV | WGT  | APTGRCH  | IGY.FV  | PLKIAAD | FLQAGCR  | VKIL | LADVHAFLD     | NGKTPW      |
| Pandoravirus    | .. AERPLVIV | WGT  | APTGRCH  | IGY.FV  | PLKIAAD | FLQAGCR  | VKIL | LADVHAFLD     | NGKTPW      |
| Mimivirus       | .. KDRPLKLY | WGT  | APTGRCH  | IGY.FV  | PLKIAAD | FLQAGCR  | VKIL | LADLHAYLD     | NLKTST      |
| Tupanvirus      | .. KDRPLKLY | WGT  | APTGRCH  | IGY.FV  | PLKIAAD | FLQAGCR  | VKIL | LADLHAYLD     | NLKTST      |
| Tupanvirus      | .. KDRPLKLY | WGT  | APTGRCH  | IGY.FV  | PLKIAAD | FLQAGCR  | VKIL | LADLHAYLD     | NLKTST      |
| Marseillevirus  | .. AERTVKVY | WGT  | APTGRCH  | IGY.YT  | PLKIAEL | VQAGCE   | VTIL | LADLHAYLD     | NLKTST      |
| Marseillevirus  | .. VERVVKVY | WGT  | APTGRCH  | IGY.YT  | PLKIAEL | VQAGCE   | VTIL | LADLHAYLD     | NLKTST      |
| Edafosvirus     | .. KKNKPKTY | WGT  | APTGRCH  | IGY.FL  | PLKIAAD | FLQAGCH  | VKIL | LADLHAYLD     | NLKTST      |
| Hokovirus       | .. LQEEIKTY | WGT  | APTGRCH  | IGY.FT  | QFLKIVD | YTRAGC   | VKIL | LADLHAYLD     | NLKTST      |
| Homavirus       | .. AERPLNIV | WGT  | APTGRCH  | IGY.FT  | QFLKIVD | YTRAGC   | VKIL | LADLHAYLD     | NLKTST      |
| Klosneuvirus    | .. AERPLNIV | WGT  | APTGRCH  | IGY.FT  | QFLKIVD | YTRAGC   | VKIL | LADLHAYLD     | NLKTST      |
| Fadolivirus     | .. AERPLNIV | WGT  | APTGRCH  | IGY.FT  | QFLKIVD | YTRAGC   | VKIL | LADLHAYLD     | NLKTST      |
| Megavirus       | .ESFKNFTA   | YNG  | FEPSGRIH | AQALIT  | VMNTNTI | IQNGGSM  | IYY  | LADWFA        | QMNHKMGDDL  |
| Megavirus       | .ESFKNFTA   | YNG  | FEPSGRIH | AQALIT  | VMNTNTI | IQNGGSM  | IYY  | LADWFA        | QMNHKMGDDL  |
| Acanthamoeba    | .KSGKKFTA   | YNG  | FEPSGRIH | AQALIT  | VMNTNEI | ISCGGRMI | IYY  | LADLFA        | KMNKKMDSDL  |

|                 |           | α5      |        | β4        |        | η1     |          | α6    |         |
|-----------------|-----------|---------|--------|-----------|--------|--------|----------|-------|---------|
|                 | 80        | 90      | 100    | 110       | 120    |        |          |       |         |
| Methanococcus   | DEIRKIGDY | NK...   | KVFEAM | GLK...    | AKYVYG | SEFQ   | LDKD...  | YTLN  | VYRLA   |
| Megavirus       | EKIRDVGY  | FI...   | EVFKAC | GINMSG... | TKFIWA | SEFF   | NDNATK   | YFER  | MLHIA   |
| Cafeteria       | EKIRDVGY  | FI...   | EVFKAC | GINMSG... | TKFIWA | SEFF   | NDNATK   | YFER  | MLHIA   |
| Megavirus       | EKIRDVGY  | FI...   | EVFKAC | GINMSG... | TKFIWA | SEFF   | NDNATK   | YFER  | MLHIA   |
| Megavirus       | EKIRDVGY  | FI...   | EVFKAC | GINMSG... | TKFIWA | SEFF   | NDNATK   | YFER  | MLHIA   |
| Mimivirus       | EKIRDVGY  | FI...   | EVFKAC | GINMSG... | TKFIWA | SEFF   | NDNATK   | YFER  | MLHIA   |
| Moumouvirus     | DKIKDVGLY | FI...   | EVFKAC | GINMSG... | TKFIWA | SEFF   | NDNATK   | YFER  | MLHIA   |
| Megavirus       | DKIKDVGLY | FI...   | EVFKAC | GINMSG... | TKFIWA | SEFF   | NDNATK   | YFER  | MLHIA   |
| Saudi           | DKIKDVGLY | FI...   | EVFKAC | GINMSG... | TKFIWA | SEFF   | NDNATK   | YFER  | MLHIA   |
| Cotonvirus      | EKIQNVGRY | FI...   | EVFKAC | GIDTSN... | TEFIWA | SEFF   | FAKNPSR  | YFQRM | MDVDS   |
| Acanthamoeba    | NKIRELGRY | FI...   | EVFKAC | GINLDG... | TRFIWA | SEFF   | IASNPS   | YIER  | MLDIA   |
| Acanthamoeba    | NKIRELGRY | FI...   | EVFKAC | GINLDG... | TRFIWA | SEFF   | IASNPS   | YIER  | MLDIA   |
| Mimivirus       | NKIRELGRY | FI...   | EVFKAC | GINLDG... | TRFIWA | SEFF   | IASNPS   | YIER  | MLDIA   |
| Niemeyer        | NKIRELGRY | FI...   | EVFKAC | GINLDG... | TRFIWA | SEFF   | IASNPS   | YIER  | MLDIA   |
| Samba           | NKIRELGRY | FI...   | EVFKAC | GINLDG... | TRFIWA | SEFF   | IASNPS   | YIER  | MLDIA   |
| Mimivirus       | NKIRELGRY | FI...   | EVFKAC | GINLDG... | TRFIWA | SEFF   | IASNPS   | YIER  | MLDIA   |
| Hirudovirus     | NKIRELGRY | FI...   | EVFKAC | GINLDG... | TRFIWA | SEFF   | IASNPS   | YIER  | MLDIA   |
| Acanthamoeba    | NKIRELGRY | FI...   | EVFKAC | GINLDG... | TRFIWA | SEFF   | IASNPS   | YIER  | MLDIA   |
| Acanthamoeba    | NKIRELGRY | FI...   | EVFKAC | GINLDG... | TRFIWA | SEFF   | IASNPS   | YIER  | MLDIA   |
| Niemeyer        | EKIRELGRY | FI...   | EVFKAC | GINLDG... | TKFIWA | SEFF   | IASNPS   | YIER  | MLDIA   |
| Catovirus       | KKIQAGKDM | I...    | LMWKAC | DMNL      | DKVDK  | GNKMI  | EFLWS    | SEE   | INKRPDE |
| Terrestriovirus | ED.EAKTEY | YKQMIT  | ELLRL  | NADLSK    | ...    | VKFVKG | SEYQ     | YSKP  | .. YMQD |
| Harvovirus      | DN.QLRTOY | YQIMITE | LLKLN  | VDMSK     | ...    | IKFVIG | SSQ      | QETKE | .. YMR  |
| Orpheovirus     | DLVSLRIE  | WYELI   | IKEM   | MLKRV     | GVSLEN | ...    | LKFVIG   | STF   | QLSKE   |
| Pandoravirus    | DLVEHRCRW | YEFAIK  | AMLQ   | HIGV      | PLDR   | ...    | LEFVIRG  | TEY   | QCSA    |
| Pandoravirus    | DLVEHRCRW | YEFAIK  | AMLQ   | HIGV      | PLDR   | ...    | LEFVIRG  | TEY   | QCSA    |
| Pandoravirus    | DLVEHRCRW | YEFAIK  | AMLQ   | HIGV      | PLDR   | ...    | LEFVIRG  | TEY   | QCSA    |
| Pandoravirus    | DLVEHRCRW | YEFAIK  | AMLQ   | HIGV      | PLDR   | ...    | LEFVIRG  | TEY   | QCSA    |
| Mimivirus       | DLVQIRIT  | TCYEMI  | IKRIL  | QIFK      | VP     | ...    | LRFVIRG  | SEF   | QTSPE   |
| Tupanvirus      | QVVEYRTI  | YIEKMI  | KAIL   | KNLNV     | SLDK   | ...    | LTFFVIRG | SSQ   | QTSPE   |
| Tupanvirus      | QVVEYRTI  | YIEKMI  | KAIL   | KNLNV     | SLDK   | ...    | LTFFVIRG | SSQ   | QTSPE   |
| Marseillevirus  | KQVHNRS   | SDYTRI  | IKNML  | QLNVD     | LDK    | ...    | VTFVIRG  | SSQ   | QTSPE   |
| Marseillevirus  | KQVHNRS   | SDYTRI  | IKNML  | QLNVD     | LDK    | ...    | VTFVIRG  | SSQ   | QTSPE   |
| Edafosvirus     | DQLNSRCE  | YTHMI   | KEIL   | KNLNV     | SLDK   | ...    | LEFVIRG  | TD    | QNLKE   |
| Hokovirus       | ELLNARTE  | YITMI   | KEIL   | KNLNV     | SLDK   | ...    | LEFVIRG  | TD    | QNLKE   |
| Homavirus       | ELLNARTE  | YITMI   | KEIL   | KNLNV     | SLDK   | ...    | LEFVIRG  | TD    | QNLKE   |
| Klosneuvirus    | EQVGHRS   | SEYITMI | KALL   | TSNLD     | VNKL   | ...    | IKFVIRG  | TEF   | QLSKE   |
| Fadolivirus     | EQVDARTK  | YTVLI   | QELL   | KSLNV     | DSR    | ...    | LKFVIRG  | TD    | QNLKE   |
| Megavirus       | EKIKDVGY  | FI...   | EVFKAC | GINMSG... | TKFIWA | SEFF   | NDNATK   | YFER  | MLHIA   |
| Megavirus       | EKIKDVGY  | FI...   | EVFKAC | GINMSG... | TKFIWA | SEFF   | NDNATK   | YFER  | MLHIA   |
| Acanthamoeba    | DKIKDVGLY | FI...   | EVFKAC | GINMSG... | TKFIWA | SEFF   | NDNATK   | YFER  | MLHIA   |











**Methanococcus**

|                 |                                                           |
|-----------------|-----------------------------------------------------------|
| Methanococcus   | .....                                                     |
| Megavirus       | .....                                                     |
| Cafeteria       | .....                                                     |
| Megavirus       | .....                                                     |
| Megavirus       | .....                                                     |
| Mimivirus       | .....                                                     |
| Moumouvirus     | .....                                                     |
| Megavirus       | .....                                                     |
| Saudi           | .....                                                     |
| Cotonvirus      | .....                                                     |
| Acanthamoeba    | .....                                                     |
| Acanthamoeba    | .....                                                     |
| Mimivirus       | .....                                                     |
| Niemeyer        | .....                                                     |
| Samba           | .....                                                     |
| Mimivirus       | .....                                                     |
| Hirudovirus     | .....                                                     |
| Acanthamoeba    | .....                                                     |
| Acanthamoeba    | .....                                                     |
| Niemeyer        | .....                                                     |
| Catovirus       | .....                                                     |
| Terrestriovirus | .....                                                     |
| Harvfovirus     | .....                                                     |
| Orpheovirus     | .....                                                     |
| Pandoravirus    | .....                                                     |
| Mimivirus       | KKMTKKMTKKITTKTIELSLEDKIACELKAIQKMEQHIIFFKKKKVEELRRQMGEKE |
| Tupanvirus      | .....                                                     |
| Tupanvirus      | .....                                                     |
| Marseillevirus  | .....                                                     |
| Marseillevirus  | .....                                                     |
| Edafosvirus     | .....                                                     |
| Hokovirus       | .....                                                     |
| Homavirus       | .....                                                     |
| Klosneuvirus    | .....                                                     |
| Fadolivirus     | .....                                                     |
| Megavirus       | .....                                                     |
| Megavirus       | .....                                                     |
| Acanthamoeba    | .....                                                     |

**Figure S2.** Sequence alignment of MjTyrRS and 40 giant virus derived TyrRSs. The TyrRSs are from *Methanococcus jannaschii*; *Megavirus chileensis*; *Cafeteria roenbergensis* virus BV-PW1; *Megavirus courdo*7-2; *Megavirus vitis*; *Mimivirus* sp. SH; *Moumouvirus australiensis*; *egavirus courdo* 7-1; *Saudi moumouvirus*; *Cotonvirus japonicus*; *Acanthamoeba castellanii mimivirus*; *Acanthamoeba polyphaga mimivirus*; *Mimivirus Bombay*; *Niemeyer virus-1*; *Samba virus*; *Mimivirus reunion*; *Hirudovirus strain Sangsue*; *Acanthamoeba castellanii mamavirus*; *Acanthamoeba polyphaga lentillevirus*; *Niemeyer virus-2*; *Catovirus CTV1*; *Terrestriovirus* sp.; *Harvfovirus* sp.; *Orpheovirus IHUMI-LCC2*; *Pandoravirus macleodensis*; *Pandoravirus salinus*; *Pandoravirus japonicus*; *Pandoravirus dulcis*; *Mimivirus LCMiAC01*; *Tupanvirus soda lake*; *Tupanvirus deep ocean*; *Marseillevirus LCMAC202*; *Marseillevirus LCMAC201*; *Edafosvirus* sp.; *Hokovirus HKV1*; *Homavirus* sp.; *Klosneuvirus KNV1*; *Fadolivirus 1*, *Megavirus courdo*11, *Megavirus lba* isolate LBA111, *Acanthamoeba polyphaga moumouvirus*. The secondary structural elements of the *M. jannaschii* are indicated above the alignment as coils for  $\alpha$ -helices and arrows for  $\beta$ -strands. The residues that are conserved among the *M. jannaschii* and giant viruses are marked in red, and slightly less conservative residues are in red font and framed by blue boxes. Alignments were done with ClustalX2. The figure was drawn with ESPript.



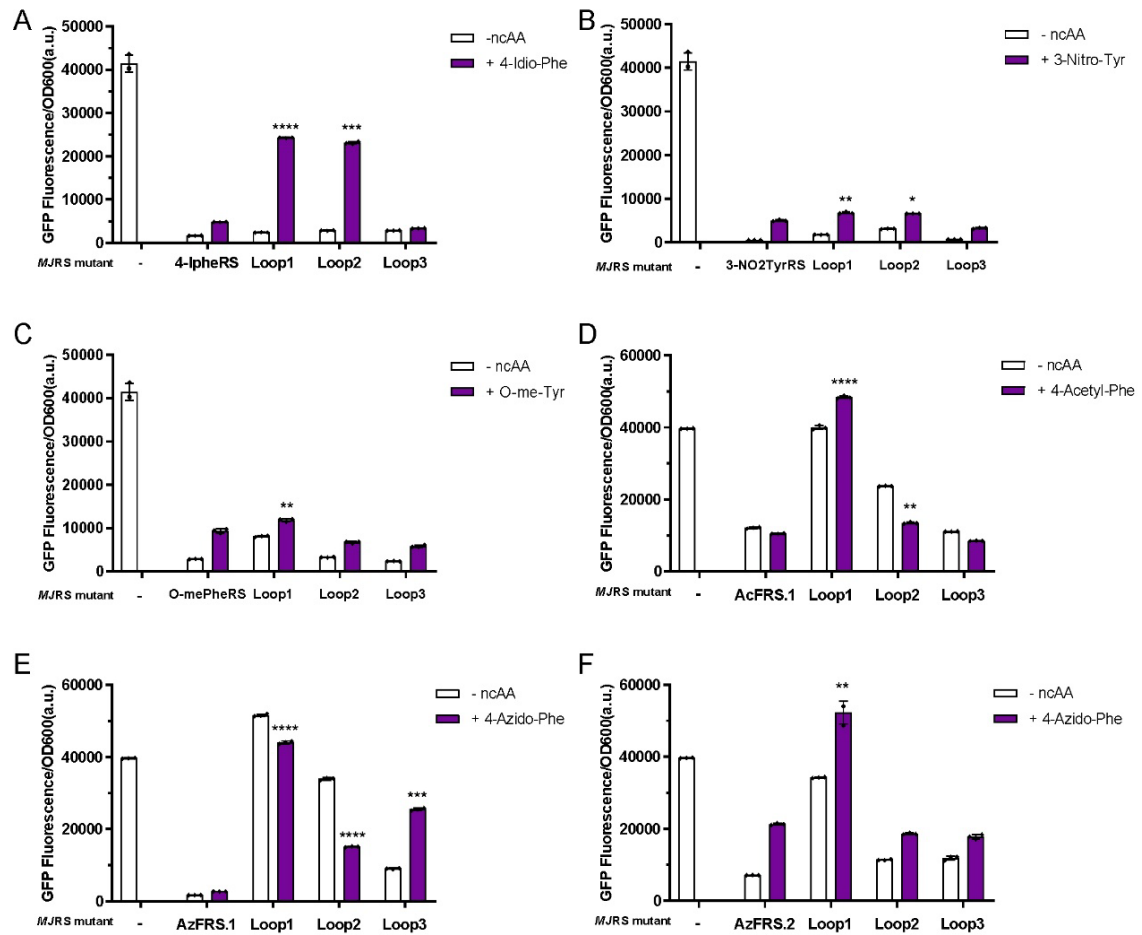

**Figure S3.** The fluorescence assays of the MjTyrRS loop-minimized mutants to incorporate ncAAs. For the protein expression, pEvolve bears MjTyrRS and pBAD plasmid bears tRNA and GFP reporter. (A) 4-I-Phe MjTyrRS mutant (B) 3-NO<sub>2</sub>-Tyr MjTyrRS mutant (C) O-Me-Tyr MjTyrRS mutant (D) AcFRS.1 (E) AzFRS.1 (F) AzFRS.2. Error bars represented the  $\pm$  standard error of the mean from three biologically independent experiments. Statistical significance is quantified with ordinary one-way ANOVA.

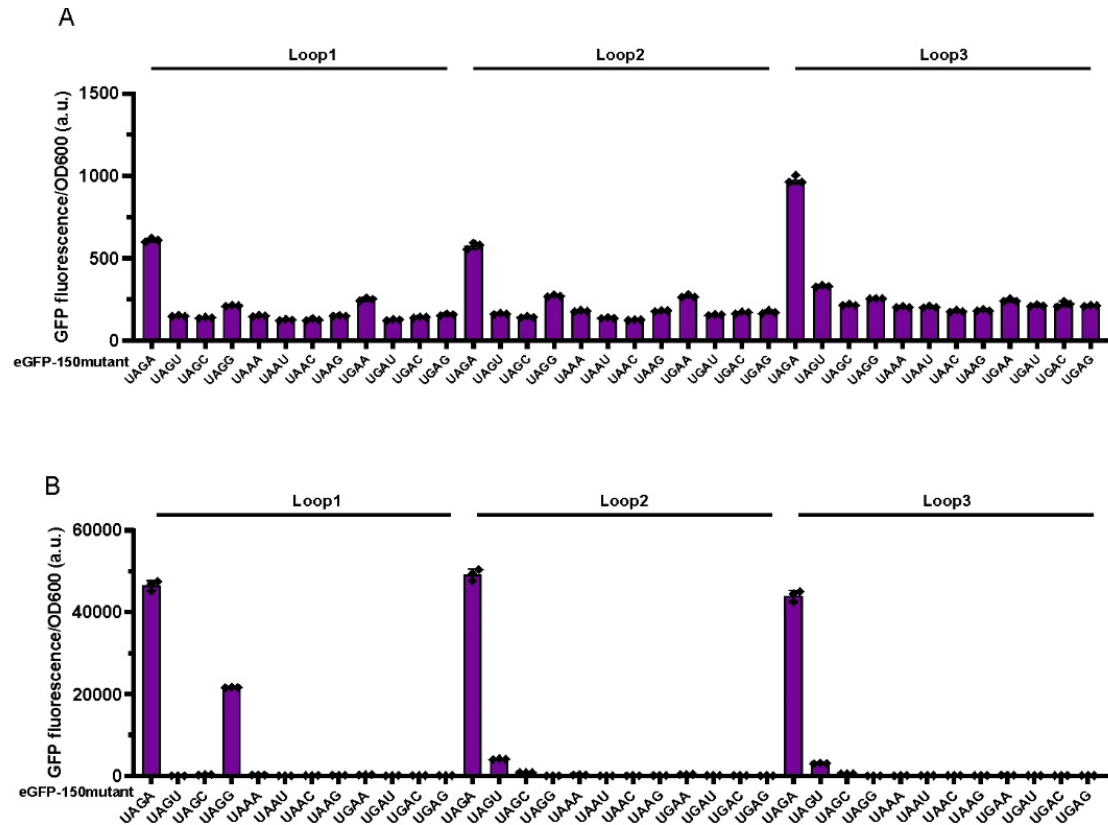

**Figure S4.** Analysis of quadruplet codons suppression activity of the loop-minimized MjTyrRS. The suppression efficiency is characterized by eGFP reporter assay in *E. coli* (A) DH10B and (B) C321.ΔA.expΔPBAD strain respectively. Error bars represented  $\pm$  standard error of the mean from three biologically independent experiments.

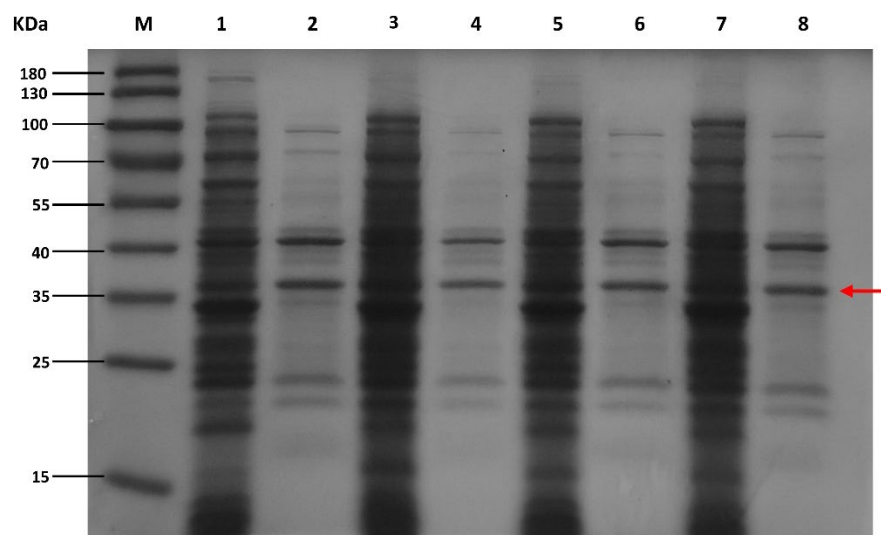

**Figure S5.** The SDS-PAGE result of the supernatant and precipitate fractions of the MjTyrRS and its loop-minimized mutants. After overnight expression, the bacteria were harvested and lysed by Bugbuster. The supernatant and precipitate fractions were subsequently separated by centrifugation for SDS-PAGE separately. The lanes in the gel are: M: 180 kDa Prestained

Protein Marker; Lane 1: MjTyrRS precipitate fraction; Lane 2: MjTyrRS supernatant fraction; Lane 3: MjTyrRS Loop1 mutant precipitate fraction; Lane 4: MjTyrRS Loop1 mutant supernatant fraction; Lane 5: MjTyrRS Loop2 mutant precipitate fraction; Lane 6: MjTyrRS Loop2 mutant supernatant fraction; Lane 7: MjTyrRS Loop3 mutant precipitate fraction; Lane 8: MjTyrRS Loop3 mutant supernatant fraction. The red arrow points to the position corresponding to the size of MjTyrRS.

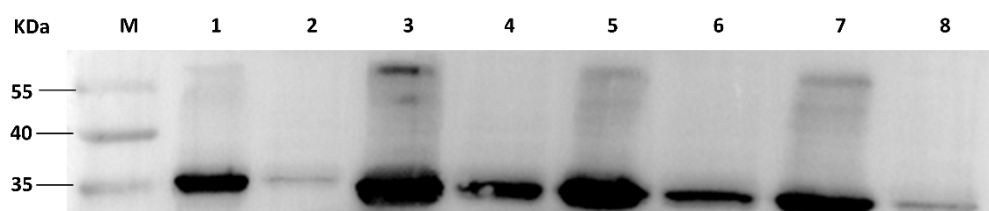

**Figure S6.** The Western Blot result of the supernatant and precipitate fractions of the MjTyrRS and its loop-minimized mutants. After the expression of MjTyrRS and its loop-minimized mutants fused with the HA tag, the cell fragmentation supernatants and precipitates were carried out for SDS-PAGE, followed by the Western Blot test. The lanes on the cellulose-nitrate membrane are: M: partial bands of the 180 kDa Prestained Protein Marker; Lane 1: MjTyrRS precipitate fraction; Lane 2: MjTyrRS supernatant fraction; Lane 3: MjTyrRS Loop1 mutant precipitate fraction; Lane 4: MjTyrRS Loop1 mutant supernatant fraction; Lane 5: MjTyrRS Loop2 mutant precipitate fraction; Lane 6: MjTyrRS Loop2 mutant supernatant fraction; Lane 7: MjTyrRS Loop3 mutant precipitate fraction; Lane 8: MjTyrRS Loop3 mutant supernatant fraction.

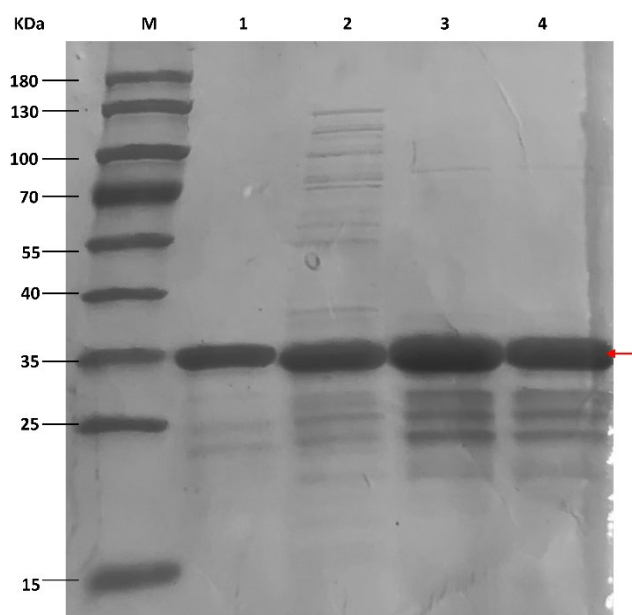

**Figure S7.** The SDS-PAGE result of purification of the MjTyrRS and its loop-minimized mutants by  $\text{Co}^{2+}$  affinity chromatography. The lanes in the gel are: M: 180 kDa Prestained

Protein Marker r; Lane 1: wild-type MjTyrRS; Lane 2: MjTyrRS Loop1; Lane 3: MjTyrRS Loop2; Lane 4: MjTyrRS Loop3. The red arrow points to the position corresponding to the size of MjTyrRS.

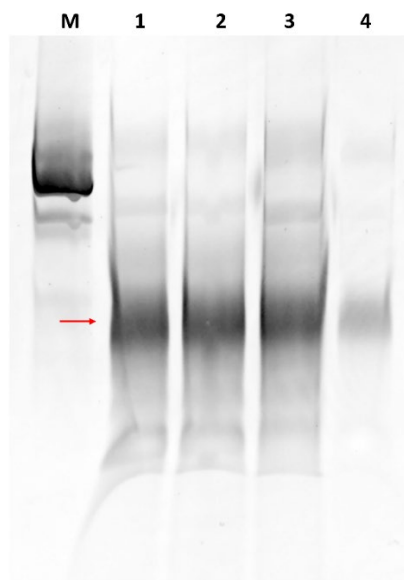

**Figure S8.** The denaturing polyacrylamide–urea gels result of the purified MjtRNA. The MjRNAs were resolved by electrophoresis on 7 M urea/12% acrylamide gels. The bands on the gel are: M: DNA template used for transcription as marker(139bp) 1~2: purified MjtRNA<sub>CUA</sub>(77nt) 3~4: purified MjtRNA<sub>UCUA</sub>(78nt). The red arrow indicates the position of the corresponding band of mjtRNA.

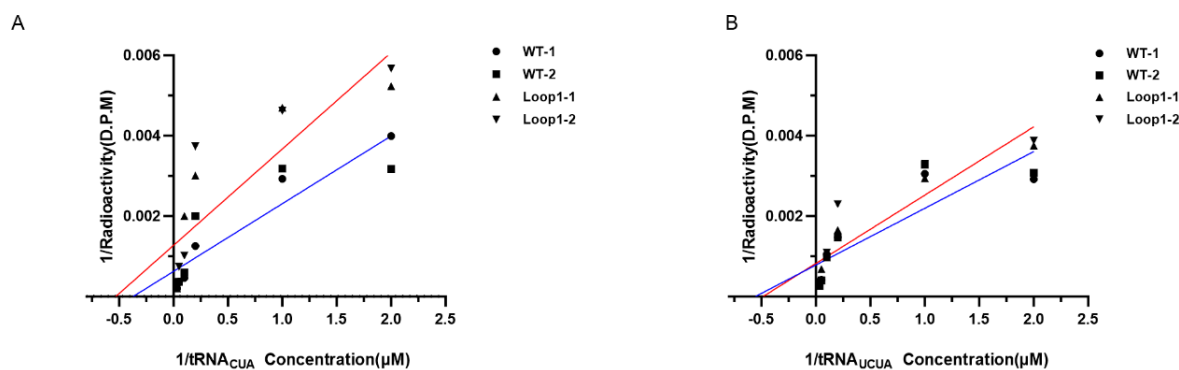

**Figure S9.** The aminoacylation assays of wild-type MjTyrRS and MjTyrRS Loop1 in response to (A) MjtRNA<sub>CUA</sub> and (B) MjtRNA<sub>UCUA</sub>. The assay method was described in the **Aminoacylation assays in vitro**. The substrates for the reactions were triplet MjtRNA<sub>CUA</sub> and quadruplet MjtRNA<sub>UCUA</sub>, respectively. The horizontal coordinates in the graph above represent the reciprocal of the substrate concentration, and the vertical coordinates represent the reciprocal of the measured radioactivity. The fitting curves of wild-type MjTyrRS and loop1 are shown in blue and red, respectively. Each set of experiments was repeated twice, distinguished by 1 and 2 after the group name.

**Table S3.** Kinetic parameter for tyrosylation by wild-type MjTyrRS and MjTyrRS Loop1.

|                        | $K_m(\mu\text{M})$ for wt-MjTyrRS | $K_m(\mu\text{M})$ for MjTyrRS Loop-<br>1 |
|------------------------|-----------------------------------|-------------------------------------------|
| MjtRNA <sub>CUA</sub>  | 4.74                              | 1.88                                      |
| MjtRNA <sub>UCUA</sub> | 1.77                              | 1.82                                      |

**tRNA preparation:**

The MjtRNA used in this work, whose corresponding DNA sequences begin with an unfavorable nucleotide for transcription by T7 polymerase, was prepared by the ‘transzyme’ method. After transzyme transcription, the reaction was incubated at 60 °C for autocatalytic cleavage to produce the desired tRNA. The transcripts were then purified using a DEAE sepharose column, and the purified MjtRNA was obtained by elution using a buffer containing NaCl. The tRNA was then precipitated overnight by adding double-volume isopropanol. The precipitated MjtRNA was washed twice with ice-ethanol the following day and then dissolved in aminoacylation assay buffer.

**Aminoacylation assays in vitro:**

The MjtRNA transcripts were obtained by in vitro transcription, and the purified MjTyrRS and its loop-minimized mutants were obtained by affinity chromatography methods. Before the aminoacylation assay, the MjtRNA transcripts were renatured by heating for 2 minutes at 80 °C, followed by slow cooling to room temperature. Tyrosylation of RNAs was performed in 150 mM Hepes/KOH pH 7.5, 15 mM MgCl<sub>2</sub>, 10 mM ATP, 5 mg/mL BSA, and 20 M dithioerythritol. <sup>14</sup>C isotope-labeled tyrosine was diluted to a radioactivity of 18.75  $\mu\text{Ci/mL}$ . Kinetic parameters were determined in the presence of 2  $\mu\text{M}$  of MjTyrRS or its loop-minimized mutants and transcripts concentrations varying from 0.5  $\mu\text{M}$  to 30  $\mu\text{M}$ . After incubation at 37 °C for 5 min, aliquots were removed, spotted on Whatman 3mm paper, and precipitated by trichloroacetic acid. The incorporation of radioactive tyrosine was measured by liquid scintillation. Radioactivity values were obtained by a Hitachi Aloka LSC-8000. The kinetic constants  $K_m$  were derived from Lineweaver–Burk plots, and the data shown represent an average of at least two independent experiments.
